# Supplementary material
Source: PubMed Central journal article supplement (PMC4269785)
Supplement: mmc2.pdf [file mmc2.pdf]

## Article

# Feedback Mechanism for Microtubule Length Regulation by Stathmin Gradients

Maria Zeitz<sup>1</sup> and Jan Kierfeld<sup>1,\*</sup><sup>1</sup>Physics Department, TU Dortmund University, Dortmund, Germany

**ABSTRACT** We formulate and analyze a theoretical model for the regulation of microtubule (MT) polymerization dynamics by the signaling proteins Rac1 and stathmin. In cells, the MT growth rate is inhibited by cytosolic stathmin, which, in turn, is inactivated by Rac1. Growing MTs activate Rac1 at the cell edge, which closes a positive feedback loop. We investigate both tubulin sequestering and catastrophe promotion as mechanisms for MT growth inhibition by stathmin. For a homogeneous stathmin concentration in the absence of Rac1, we find a switchlike regulation of the MT mean length by stathmin. For constitutively active Rac1 at the cell edge, stathmin is deactivated locally, which establishes a spatial gradient of active stathmin. In this gradient, we find a stationary bimodal MT-length distribution for both mechanisms of MT growth inhibition by stathmin. One subpopulation of the bimodal length distribution can be identified with fast-growing and long pioneering MTs in the region near the cell edge, which have been observed experimentally. The feedback loop is closed through Rac1 activation by MTs. For tubulin sequestering by stathmin, this establishes a bistable switch with two stable states: one stable state corresponds to upregulated MT mean length and bimodal MT length distributions, i.e., pioneering MTs; the other stable state corresponds to an interrupted feedback with short MTs. Stochastic effects as well as external perturbations can trigger switching events. For catastrophe-promoting stathmin, we do not find bistability.

## INTRODUCTION

Microtubules (MTs), an essential part of the cytoskeleton of eukaryotic cells, are involved in many cellular processes. These include cell division (1), intracellular positioning processes (2) such as positioning of the cell nucleus (3) or chromosomes during mitosis, establishment of cell polarity (4), and regulation of cell length (5). In all of these processes, the MT cytoskeleton has to be able to change shape and adjust the MT length distribution by polymerization and depolymerization. MT polymerization and depolymerization also plays a crucial role in the constant reorganization of the cytoskeleton of motile cells such as fibroblasts (6) or cells growing into polar shapes such as neurons (7). In motile cells, protrusion forces are often generated by the actin lamellipodium at the cell edge, but MTs interact with the actin cytoskeleton and actively participate in the regulation of motility (6). As a result, the MT cytoskeleton shape has to adjust to changing cell shapes during locomotion.

The fast spatial reorganization of MTs is based on the dynamic instability: phases of elongation by polymerization are stochastically interrupted by catastrophes that initiate phases of fast depolymerization; fast depolymerization terminates stochastically in a rescue event followed again by a polymerization phase (8).

Regulation of MT length is crucial for the MT cytoskeleton to change shape. MT length regulation by depolymerases and polymerases such as kinesin-8 or XMAP215, which directly bind to the MT, has been studied both experimentally (see Howard and Hyman (9) and Tolić-Nørrelykke (10) for reviews) and theoretically (11–15). Here, we want to explore and analyze models for cellular MT length regulation by the signaling proteins Rac1 and stathmin, which do not directly associate with MTs but are localized at the cell edge or in the cytosol, respectively.

Experiments have shown that dynamic MTs participate in regulation mechanisms at the lamellipodium of protruding cells through interaction with Rac1 (6,16,17). Rac1 is a signaling molecule that controls actin dynamics and is essential for cell motility (18). It is a GTPase of the Rho family that has been found to be active (phosphorylated) at the edge of protruding cells (6,16) as it becomes membrane-bound in its active state (19). Rac1 activation at the cell edge has been shown to be correlated with MT polymerization (6). Therefore, it has been suggested that polymerizing MTs play an important role in activating Rac1 at the cell edge (17). The activation of Rac1 by MTs could involve their guanine-nucleotide-exchange factors. For the following, we will assume that Rac1 is activated by contact of MTs with the cell edge.

MTs are also targets of cellular regulation mechanisms, which affect their dynamic properties (20). The dynamic instability of MTs enables various regulation mechanisms of MT dynamics. In vivo, various MT-associated proteins

Submitted May 8, 2014, and accepted for publication October 22, 2014.

\*Correspondence: [jan.kierfeld@tu-dortmund.de](mailto:jan.kierfeld@tu-dortmund.de)

Editor: David Odde.

© 2014 by the Biophysical Society  
0006-3495/14/12/2860/12 \$2.00

<http://dx.doi.org/10.1016/j.bpj.2014.10.056>

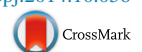

have been found that either stabilize or destabilize MTs by direct interaction with the MT lattice, and regulate MT dynamics both spatially and temporally (21).

MT polymerization can also be regulated by the soluble protein stathmin, which diffuses freely in the cytosol and inhibits MT polymerization (22). The mechanism of MT inhibition by stathmin is still under debate (23) with the discussion focusing on two mechanisms (22,23):

1. Stathmin inhibits MT growth via sequestering of free tubulin. One mole of active (nonphosphorylated) stathmin binds two moles of free tubulin and thereby lowers the local tubulin concentration (24–27). Consequently, the growth velocity of the MT is suppressed and the catastrophe rate, increased.
2. At high pH values, stathmin does not affect the growth velocity but only increases the MT catastrophe rate (27), possibly by direct interaction with the MT lattice (23).

Stathmin can be regulated by deactivation upon phosphorylation (22). One pathway of stathmin regulation is the Rac1-Pak pathway, where Rac1 deactivates stathmin through the intermediate protein Pak (28,29). Similar to Rac1, Pak has also been found to be localized in the leading edge of motile cells (30). Because the active form of Rac1 is situated at the cell edge, this introduces a spatial gradient of stathmin phosphorylation and thereby stathmin tubulin interaction (31).

Thus, there is a positive feedback loop of MT regulation (32,33,34) consisting of the activation of localized Rac1 by polymerizing MTs at the cell edge, the inhibition of cytosolic stathmin by active Rac1 via the Rac1-Pak pathway at the cell edge, and, finally, the inhibition of MT polymerization by stathmin, which sequesters tubulin or promotes catastrophes. The overall result is a positive feedback loop consisting of one positive (activating) and a doubly negative (inhibitory) interaction (Fig. 1, A and B). Polymerizing MTs are an essential part of this feedback loop. Therefore, this feedback system represents a seemingly novel type of spatially organized biochemical network, which could give rise to new types of spatial organization (35). In this article, we will formulate and analyze a theoretical model for this feedback loop for tubulin-sequestering stathmin and for purely catastrophe-promoting stathmin. Using this model, we address the question how the feedback loop regulates the MT length.

The general structure of the described positive feedback mechanism suggests two hypotheses for MT regulation, which we investigate within our model:

1. The positive feedback increases MT growth and, thus, MT length.
2. Nonlinearities in the positive feedback loop can give rise to a bistable switching between states of inhibited and increased MT growth.

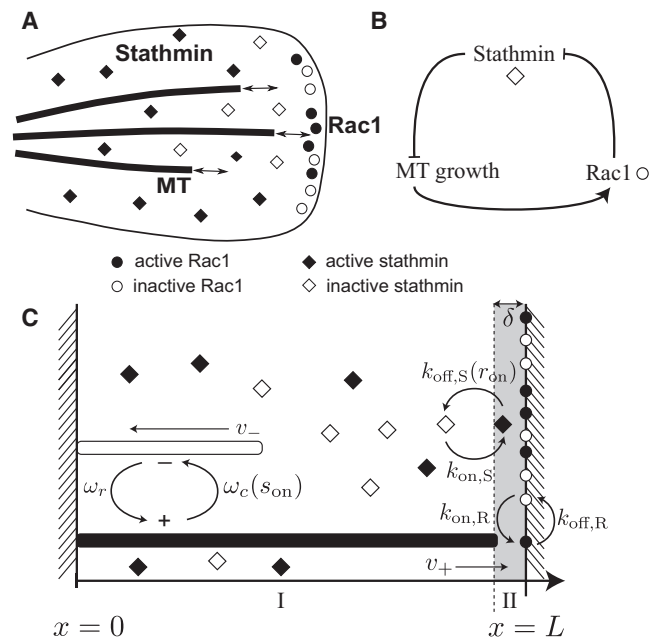

FIGURE 1 (A) Sketch of the feedback loop for MT growth regulation by Rac1 and stathmin in a cell. (B) Abstract scheme of the feedback loop. (C) Sketch of the one-dimensional model. The MT switches between growing (solid bar) or shrinking state (open bar) with rescue and catastrophe rates  $\omega_r$  and  $\omega_c$ , respectively. Rac1 proteins (circles) are located at the cell edge  $x = L$  in active or inactive form (solid and open circles, respectively). Rac1 is activated with a rate  $k_{on,R}$  only if the MT enters the shaded region II of size  $\delta$  representing the cell edge, and deactivated at all times with the rate  $k_{off,R}$ . Stathmin deactivation only takes place in the shaded region II with a rate proportional to the fraction of active Rac1  $k_{off,S}r_{on}$ . The local concentration of active stathmin inhibits MT growth by tubulin sequestering, which reduces the MT growth velocity  $v_+$  locally, or by direct catastrophe promotion.

Regarding Hypothesis 1, we will confirm that the regulation loop enhances MT growth. We will also show that polymerizing MTs as one part of the loop result in a particular spatial organization of the feedback loop with bimodal MT length distributions. This allows us to successfully explain the occurrence of pioneering MTs as they have been observed in Waterman-Storer and Salmon (36) and Wittmann et al. (32). Such pioneering MTs grow into the leading edge of migrating cells and exhibit a decreased catastrophe frequency. In the experiments in Wittmann et al. (32), this pioneering behavior could be promoted by introducing constitutively active Rac1 and suppressed by introducing constitutively inactive Rac1 into the cells indicating that the mechanism underlying the pioneering MTs involves regulation by Rac1. Our model shows there is a window of stathmin concentrations for which the MT length distribution is bimodal, and which consists of two subpopulations: fast growing, long pioneering MTs near the cell edge; and collapsed MTs with suppressed growth rates distant from the cell edge. This bimodality is caused by a gradient in stathmin phosphorylation.

Regarding Hypothesis 2, we will show that our model exhibits bistability only if stathmin inhibits MT growth by tubulin sequestering. The stathmin activation gradient, which upregulates MT growth near the cell edge, represents one stable state of the switch; complete stathmin deactivation with shorter MTs represents the other state. If stathmin acts by promoting MT catastrophes, we do not find bistability.

## MATERIALS AND METHODS

We formulate an effective model in which we focus on MT regulation through Rac1 and stathmin. We do not model the Rac1 activation pathway through MTs at the cell edge explicitly (which requires most likely the action of additional guanine-nucleotide-exchange factors), and we do not model the pathway of stathmin deactivation by Rac1 explicitly (which also involves Pak and, most likely, other signaling molecules). The following experimental facts are included: MT growth is inhibited by active stathmin; we consider both tubulin sequestering and catastrophe promotion as inhibition mechanisms. Dynamic MTs activate localized Rac1 upon contacting the cell edge. Activated Rac1, in turn, inhibits stathmin at the cell edge. Our effective model then reduces to an amplifying positive feedback loop, which is composed of one positive and two inhibitory interactions (see Fig. 1 B).

We describe this regulation mechanism as a modified reaction-diffusion process that includes directed MT polymerization and approach the problem by particle-based stochastic simulations and analytical mean-field calculations. For simplicity, we consider one spatial dimension, i.e., regulation in a narrow box of length  $L$  along the  $x$  axis of the growing MT. The model includes  $m$  independent MTs confined within the box, Rac1 proteins, which are localized at the right boundary of the box representing the cell edge, and stathmin proteins, which diffuse freely along the box (Fig. 1 C). Our model for MT regulation is characterized by a number of parameters, for many of which experimental information is already available, which we collected in Table 1 (37–48).

**TABLE 1 Literature values for parameters**

| Parameter                                                                                                      | Values                                                                       | References       |
|----------------------------------------------------------------------------------------------------------------|------------------------------------------------------------------------------|------------------|
| <b>Microtubule</b>                                                                                             |                                                                              |                  |
| Growth velocity $v_+$                                                                                          | 7–80 nm/s                                                                    | (37–40)          |
| Shrinking velocity $v_-$                                                                                       | 0.18–0.5 $\mu\text{m/s}$                                                     | (37–39)          |
| Effective dimer length $d$                                                                                     | 8/13 nm $\approx$ 0.6 nm                                                     |                  |
| Tubulin association rate<br>$\omega_{\text{on}} = \kappa_{\text{on}}[T_0]$ for $[T_0] =$<br>7–20 $\mu\text{M}$ | 62–178 1/s                                                                   | (39)             |
| Rescue rate $\omega_r$                                                                                         | 0.05–0.5 1/s                                                                 | (39,41,42)       |
| Catastrophe rate<br>$\omega_c = 1/a + bv_+$                                                                    | $b = 1.38 \times 10^{10} \text{ s}^2 \text{ m}^{-1}$ ;<br>$a = 20 \text{ s}$ | (52)             |
| <b>Rac</b>                                                                                                     |                                                                              |                  |
| Intrinsic hydrolysis<br>rate $k_{\text{off},R}$                                                                | 0.0018–0.0023/s                                                              | (43,44)          |
| Hydrolysis rate $k_{\text{off},R}$ in the<br>presence of GAP                                                   | 0.039/s                                                                      | (43)             |
| <b>Stathmin</b>                                                                                                |                                                                              |                  |
| Diffusion coefficient $D$                                                                                      | 13(COPY)–73(RB3) $\mu\text{m}^2/\text{s}$                                    | (24,31)          |
| Stokes radius $R_s$                                                                                            | 33–39 $\text{\AA}$                                                           | (26,45,46)       |
| Activation gradient length<br>scale $\chi_s$                                                                   | 4–8 $\mu\text{m}$                                                            | (31)             |
| Phosphatase activity $k_{\text{on},S}$                                                                         | 0.3–0.7 1/s                                                                  | (31)             |
| Sequestering equilibrium<br>constant $K_0 = 1/K_D$                                                             | 1.43–169/ $\mu\text{M}^2$                                                    | (25,26,31,47,48) |
| Catastrophe promotion<br>constant $k_c$                                                                        | 0.002 $\text{s}^{-1} \mu\text{M}^{-1}$                                       | (27)             |

## Single microtubule in a box

The MT dynamics in the presence of the dynamic instability is described in terms of a stochastic two-state model (49,50): In the growing state, a MT polymerizes with an average velocity  $v_+$ . The MT stochastically switches from the growing state to a shrinking state with the catastrophe rate  $\omega_c$ . In the shrinking state, it rapidly depolymerizes with an average velocity  $v_-$ . With the rescue rate  $\omega_r$ , the MT stochastically switches back to the growing state.

The stochastic time evolution of an ensemble of independent MTs, growing along the  $x$  axis, can be described by two coupled master equations for the probabilities  $p_+(x,t)$  and  $p_-(x,t)$  of finding a MT with length  $x$  at time  $t$  in a growing or shrinking state (50):

$$\partial_t p_+(x,t) = -\omega_c p_+(x,t) + \omega_r p_-(x,t) - v_+ \partial_x p_+(x,t), \quad (1)$$

$$\partial_t p_-(x,t) = \omega_c p_+(x,t) - \omega_r p_-(x,t) + v_- \partial_x p_-(x,t). \quad (2)$$

We confine the MT within the one-dimensional cell of length  $L$  by reflecting boundary conditions: shrinking back to zero length gives rise to a forced rescue and contacting the boundary at  $x = L$  gives rise to an instantaneous catastrophe event. This corresponds to

$$v_+ p_+(0,t) - v_- p_-(0,t) = v_+ p_+(L,t) - v_- p_-(L,t) = 0.$$

Forced rescue at  $x = 0$  is equivalent to immediate renucleation of MTs, which are anchored at a MT organizing center. Our model does not apply to unanchored treadmilling MTs.

For a  $x$ -independent catastrophe rate  $\omega_c$ , the steady-state probability density function of finding a MT of length  $x$  can be determined analytically (12,51), as

$$p(x) = p_+(x) + p_-(x) = N \left( 1 + \frac{v_+}{v_-} \right) e^{x/\lambda}, \quad (3)$$

with a normalization

$$N^{-1} = \lambda(1 + v_+/v_-)(e^{L/\lambda} - 1),$$

where  $\lambda$  is a characteristic length parameter of

$$\lambda \equiv \frac{v_+ v_-}{v_+ \omega_r - v_- \omega_c}. \quad (4)$$

If  $\lambda < 0$ , the average length loss after catastrophe exceeds the average length gain; if  $\lambda > 0$ , the average length gain exceeds the average length loss. The resulting average MT length is given by

$$\langle x_{\text{MT}} \rangle = \int_0^L x p(x) dx = \frac{L}{1 - e^{\lambda/L}} - \lambda. \quad (5)$$

In the growing state, GTP-tubulin dimers are attached to any of the 13 protofilaments with the rate  $\omega_{\text{on}}$ , which is proportional to the local concentration of free GTP-tubulin  $[T]$ ,  $\omega_{\text{on}} = \kappa_{\text{on}}[T]$ . GTP-tubulin dimers are detached with the rate  $\omega_{\text{off}}$ . The resulting growth velocity is obtained by multiplication with the effective tubulin dimer size  $d \approx 8 \text{ nm}/13 \approx 0.6 \text{ nm}$ ,

$$v_+ = (\kappa_{\text{on}}[T] - \omega_{\text{off}})d. \quad (6)$$

In the classical model of the MT catastrophe mechanism, the catastrophe rate  $\omega_c$  is determined by the hydrolysis dynamics of GTP-tubulin with each loss of the stabilizing GTP-cap due to hydrolysis causing a catastrophe. Experimental results (52) show that the average time spent in the growing state,  $\langle \tau_+ \rangle = 1/\omega_c$ , is a linear function of the growth velocity  $v_+$ ,

$$\omega_c = \frac{1}{a + bv_+}, \quad (7)$$

with constant coefficients  $a = 20$  s and  $b = 1.38 \times 10^{10}$  s<sup>2</sup> m<sup>-1</sup>. All of our results will be robust against the choice of the catastrophe model (see the [Supporting Material](#)).

## Rac model

Rac1 (in the following called ‘‘Rac’’) proteins are small GTPases, whose activity is regulated by GTP-binding (activation) and intrinsic hydrolysis (deactivation). Rac proteins are localized at the edge of protruding cells (6,16,19), and polymerizing MTs activate Rac at the cell edge (17).

We model Rac proteins as pointlike objects situated at the boundary  $x = L$ , which can exist in two states, activated or deactivated. We denote the fraction of activated Rac by  $r_{on}$ . A boundary region  $x \in [L - \delta, L]$  of small size  $\delta$  represents the cell edge (region II in [Fig. 1 C](#)); because the details of the Rac activation are not known, we include  $\delta \ll L$  as a reaction distance. Rac activation takes place with a constant rate  $k_{on,R}$ , and only if one of the  $m$  MT contacts the right boundary region in its growing state. The deactivation of Rac, on the other hand, happens independently of the MT growth state with the constant rate  $k_{off,R}$ .

The chemical kinetics of Rac at the cell edge can be described by

$$\frac{\partial r_{on}}{\partial t} = p_{MT} k_{on,R} (1 - r_{on}) - k_{off,R} r_{on}, \quad (8)$$

where the Rac activation rate is analogous to a second-order reaction with the mean MT cell-edge contact probability (for contact in the growing state)

$$p_{MT}(t) = m \int_{L-\delta}^L p_+(x, t), \quad (9)$$

playing the role of a MT concentration, and the Rac deactivation rate is first-order. [Equations 8 and 9](#) describe the Rac kinetics at the mean-field level neglecting temporal correlations between MT cell-edge contacts and Rac number fluctuations. In a stationary state, [Eq. 8](#) gives a Rac activation level

$$r_{on} = \frac{1}{1 + k_{off,R}/p_{MT} k_{on,R}}. \quad (10)$$

Because Rac activation requires MT contact, changes in the activation rate  $k_{on,R}$  (for which there is no experimental data yet) can always be compensated by changing the number of MTs  $m$ , as it is apparent from [Eq. 10](#).

## Stathmin model

Stathmin is a soluble protein that diffuses freely in the cytosol and inhibits MT growth. We consider two possible inhibition mechanisms (22): 1) tubulin sequestering and 2) catastrophe promotion. MT growth inhibition is turned off by stathmin phosphorylation through the Rac-Pak pathway (28,29).

## Gradient in stathmin activation

The interplay of stathmin diffusion and phosphorylation by active Rac at the cell edge establishes a spatial gradient of stathmin activation.

Stathmin proteins are modeled as pointlike objects in an active or inactive state. Unlike Rac proteins, stathmin proteins diffuse freely within the whole simulation box  $x \in [0; L]$  assuming concentration profiles  $S_{on}(x)$  in the active dephosphorylated state, which can inhibit MT growth, and  $S_{off}(x)$  in the inactive phosphorylated state (with a total stathmin concentration  $S_{tot}(x) = S_{on}(x) + S_{off}(x)$ ). We assume the diffusion coefficient  $D$  to be constant and equal for both states. Switching between active and inactive states is a stochastic process with rates  $k_{on,S}$  and  $k_{off,S}$ , respectively.

Rac acts through Pak as a stathmin kinase. We describe stathmin deactivation by Rac at the cell edge  $x = L$  as a simple second-order reaction with a rate proportional to  $r_{on}$  (note that including Michaelis-Menten-like enzyme kinetics for stathmin deactivation does not alter the results qualitatively).

We assume that the phosphatase responsible for stathmin activation is homogeneously distributed within the cytosol such that stathmin dephosphorylates everywhere within the box with the constant rate  $k_{on,S}$  (53). The distribution of deactivated stathmin in the one-dimensional box is then described by a reaction-diffusion equation (see the [Supporting Material](#) for details).

In the steady state, we find a stathmin activation gradient with a profile

$$\frac{S_{on}(x)}{S_{tot}} = 1 - 2A \cosh(x/\chi_S), \quad (11)$$

which decreases with increasing  $x$  toward the cell edge  $x = L$  because stathmin is deactivated at the cell edge by Rac. The characteristic decay length for the stathmin activation gradients is given by

$$\chi_S = \sqrt{D/k_{on,S}}$$

and arises from the competition of stathmin reactivation in the bulk of the box and diffusion. The integration constant

$$A = 1/2 \frac{r_{on} k_{off,S}}{(D/\delta \chi_S) \sinh(L/\chi_S) + (r_{on} k_{off,S} + k_{on,S}) \cosh(L/\chi_S)} \quad (12)$$

depends on the degree of stathmin deactivation by Rac at the cell edge  $x = L$  and, thus, on the fraction  $r_{on}$  of activated Rac (see the [Supporting Material](#)).

Experimentally, a characteristic stathmin gradient length scale  $\chi_S = 4\text{--}8$   $\mu\text{m}$  has been measured using fluorescence resonance energy transfer with fluorescent stathmin fusion proteins (COPY) (31). Values for the diffusion constant  $D = 13\text{--}18$   $\mu\text{m}^2/\text{s}$  of the fluorescent COPY proteins (31) are consistent with activation or dephosphorylation rates  $k_{on,S} = 0.3\text{--}0.71/\text{s}$  by phosphatase activity.

## Tubulin-sequestering stathmin

One possible pathway for stathmin to inhibit MT growth is sequestering of free tubulin, which lowers the MT growth velocity  $v_+$  by decreasing the local concentration of free tubulin. It also alters the catastrophe rate  $\omega_c$  via the growth velocity, as described by [Eq. 7](#) (26).

One active stathmin protein sequesters two tubulin proteins (24–27),

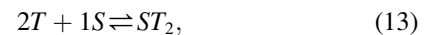

and the growth velocity  $v_+$  depends on the concentration  $[T]$  of free tubulin as described in [Eq. 6](#). Solving the chemical equilibrium equations, we find the normalized concentration of free tubulin  $t \equiv [T]/[T_0]$  (normalized by

the total tubulin concentration  $[T_0] = [T] + 2[ST_2]$  as a function of normalized active stathmin  $s_{\text{on}} \equiv S_{\text{on}}/[T_0]$ ,

$$t(s_{\text{on}}) = 1/3 \left[ 1 - 2s_{\text{on}} + \frac{-3 + k(1 - 2s_{\text{on}})^2}{k\alpha(s_{\text{on}})} + \alpha(s_{\text{on}}) \right]$$

with

$$\alpha(s_{\text{on}}) \equiv \left[ (1 - 2s_{\text{on}})^3 + (9/k)(1 + s_{\text{on}}) + 3\sqrt{(3/k^3)(1 + k^2(1 - 2s_{\text{on}})^3 + k(2 + 10s_{\text{on}} - s_{\text{on}}^2))} \right]^{1/3}, \quad (14)$$

where  $k \equiv K_0[T_0]^2$  denotes the normalized equilibrium constant of the reaction (Eq. 11). The resulting curve  $t(s_{\text{on}})$  is strongly nonlinear, and agrees well with experimental results on the amount  $1 - t$  of bound tubulin in Jourdain et al. (25).

Inserting the result  $[T] = [T_0]t(s_{\text{on}})$  in the linear Eq. 4 for the growth velocity), we also obtain a strongly nonlinear dependence of the growth velocity on active stathmin (see Fig. 2). Assuming that tubulin-stathmin association is fast compared to the other processes, a local concentration  $s_{\text{on}}(x)$  of active stathmin also gives rise to a local concentration  $[T](x) = [T_0]t(s_{\text{on}}(x))$  of free tubulin, and Eq. 6 determines the local growth velocity:

$$v_+ = v_+([T](x)) = v_+([T_0]t(s_{\text{on}}(x))). \quad (15)$$

### Catastrophe-promoting stathmin

Another possible pathway for stathmin to inhibit MT growth is by directly promoting catastrophes, possibly via direct interaction with the MT lattice (23). This pathway might be more relevant at high pH values, whereas tubulin sequestering dominates at lower pH values (27). For high pH, the data of Howell et al. (27) are consistent with a linear increase of the catastrophe rate with the concentration of active stathmin,

$$\omega_c(S_{\text{on}}) = \omega_c(0) + k_c S_{\text{on}} = \omega_c(0) + k_c [T_0] s_{\text{on}}, \quad (16)$$

with a catastrophe promotion constant  $k_c = 0.002 \text{ s}^{-1} \mu\text{M}^{-1}$ . An activation gradient of stathmin  $S_{\text{on}}(x)$  then gives rise to a local MT catastrophe rate  $\omega_c(S_{\text{on}}(x))$ .

We will use both the catastrophe promotion pathway of stathmin and the sequestering pathway in our model, and compare the resulting MT growth behavior.

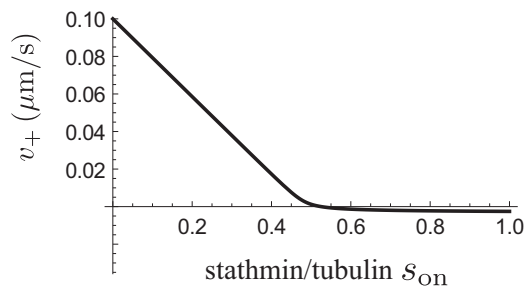

FIGURE 2 Growth velocity  $v_+$  as a function of the normalized concentration of active stathmin  $s_{\text{on}} = S_{\text{on}}/[T_0]$  as given by inserting  $[T] = [T_0]t(s_{\text{on}})$  according to Eq. 14 into Eq. 6 for  $k = K_0[T_0]^2 = 9400$  corresponding to  $K_0 = 25 \mu\text{M}^2$  and  $[T_0] = 19.4 \mu\text{M}$  (see Table 2). The sharp crossover at  $s_{\text{on}} \approx 0.5$  is a result of the tubulin sequestering in a 1:2 complex.

## Stochastic simulations

The model outlined in the previous section is the basis for our one-dimensional stochastic simulations (employing equal time steps  $\Delta t = 0.001 \text{ s}$ ). We model the MTs as straight polymers with continuous length  $x$ , and Rac and stathmin distributions via discrete particles, which can be activated and deactivated according to the rates specified above. The  $N_S$  stathmin particles can diffuse freely within the simulation box, whereas the  $N_R$  Rac particles are localized at the cell-edge region of size  $\delta$ . Details of the simulation are described in the Supporting Material.

In Table 2 we present our choice of parameters to perform simulations. We assume a tubulin concentration  $[T_0] = 19.4 \mu\text{M}$ . We choose a simulation box of length  $L = 10 \mu\text{m}$  with a cell-edge region of size  $\delta = 20 \text{ nm}$ , where Rac can be activated by MTs. In the Supporting Material, it is shown that our results are qualitatively similar for larger lengths  $L$ .

## RESULTS AND DISCUSSION

### Interrupted feedback for constitutively active stathmin in the absence of Rac

In a first step, we investigate how constitutively active stathmin alters the MT dynamics, which is equivalent to interrupting the feedback loop by removing Rac ( $r_{\text{on}} = 0$ ) such that stathmin cannot be deactivated and is homogeneously distributed,  $S_{\text{tot}} = S_{\text{on}} = \text{const}$ , due to diffusion. Because Rac is absent, all results are independent of the membrane contact probability of MTs, and we can limit the MT number to  $m = 1$ .

For homogeneously distributed stathmin, the MT growth rate  $v_+$  and the catastrophe rate  $\omega_c$  are homogeneous both for tubulin-sequestering and catastrophe-promoting

TABLE 2 Parameter values used for simulation

| Description                              | Parameter                                      | Value/Reference                        |
|------------------------------------------|------------------------------------------------|----------------------------------------|
| Time step                                | $\Delta t$                                     | 0.001 s                                |
| System length                            | $L$                                            | 10 $\mu\text{m}$                       |
| Cell-edge region                         | $\delta$                                       | 0.02 $\mu\text{m}$                     |
| <b>Microtubule</b>                       |                                                |                                        |
| Tubulin concentration                    | $[T_0]$                                        | 19.4 $\mu\text{M}$                     |
| Effective dimer length                   | $d$                                            | 8/13 nm $\approx$ 0.6 nm               |
| Growth velocity ( $S_{\text{on}} = 0$ )  | $v_+$                                          | 0.1 $\mu\text{m/s}$                    |
| Shrinking velocity                       | $v_-$                                          | 0.3 $\mu\text{m/s}$                    |
| Tubulin association rate                 | $\omega_{\text{on}} = \kappa_{\text{on}}[T_0]$ | 173/s (39)                             |
| Dissociation velocity                    | $v_{\text{off}}$                               | 3.6 nm/s (40)                          |
| Rescue rate                              | $\omega_r$                                     | 0.1/s                                  |
| Catastrophe rate ( $S_{\text{on}} = 0$ ) | $\omega_c$                                     | 0.0007/s                               |
| Number of tubulin dimers                 | $N_T$                                          | 10,000                                 |
| Corresponding to a volume                | $V$                                            | 0.86 $\mu\text{m}^3$                   |
| <b>Rac</b>                               |                                                |                                        |
| Number of Rac molecules                  | $N_R$                                          | 1000                                   |
| Activation rate                          | $k_{\text{on},R}$                              | 5/s                                    |
| Deactivation rate                        | $k_{\text{off},R}$                             | 0.002/s                                |
| <b>Stathmin</b>                          |                                                |                                        |
| Activation rate                          | $k_{\text{on},S}$                              | 1/s                                    |
| Deactivation rate                        | $k_{\text{off},S}$                             | 300/s                                  |
| Diffusion coefficient                    | $D$                                            | 15 $\mu\text{m}^2/\text{s}$            |
| Sequestering equilibrium constant        | $K_0$                                          | 25/ $\mu\text{M}^2$                    |
| Catastrophe promotion constant           | $k = K_0[T_0]^2$                               | 9400 with $[T_0] = 19.4 \mu\text{M}$   |
|                                          | $k_c$                                          | 0.002 $\text{s}^{-1} \mu\text{M}^{-1}$ |

stathmin. Then, we can calculate the MT length distribution from the analytical solution 3 for a position-independent parameter  $\lambda$  (see Eq. 4). We find good agreement between the analytical result Eq. 5 for the MT mean length and stochastic simulation results as a function of the stathmin/tubulin  $s \equiv S_{\text{tot}}/[T_0]$  ( $s = s_{\text{on}}$  for constitutively active stathmin) both for tubulin-sequestering and catastrophe-promoting stathmin (Fig. 3). Deviations are due to stochastic fluctuations of the local stathmin concentration because of diffusion.

Our main finding is that stathmin regulates MT growth in a switchlike manner if stathmin both sequesters tubulin and promotes catastrophes. For tubulin-sequestering stathmin the switch is much steeper, and we can define two stathmin concentrations,  $S_\lambda$  and  $S_v$ , which characterize the steepness of the switch. At the critical concentration  $S_\lambda$ , the characteristic length parameter  $\lambda$  (see Eq. 4) changes sign, i.e.,  $\lambda^{-1} (S_{\text{tot}} = S_\lambda) = 0$ . The condition  $\lambda^{-1} = 0$  results in a flat MT length distribution (Eq. 1) and, thus, an alternative definition of  $S_\lambda$  is  $\langle x_{\text{MT}} \rangle (S_{\text{tot}} = S_\lambda) = L/2$ .

Above the critical stathmin concentration  $S_\lambda$ , we find the MT length distributions to be negative exponentials. At the second, higher critical concentration  $S_v$ , the MT growth velocity  $v_+$  (see Eqs. 6 and 14) changes sign, i.e.,  $v_+(S_{\text{tot}} = S_v) = 0$ . Above  $S_v$ , the MT cannot grow at all and  $\langle x_{\text{MT}} \rangle = 0$  for  $S \geq S_v$ . For catastrophe-promoting stathmin, the switch is much broader because the MT growth velocity is not affected, formally resulting in an infinite  $S_v$ . A critical concentration  $S_\lambda$  can be defined in the same way as for tubulin-sequestering stathmin.

For tubulin-sequestering stathmin, the critical stathmin/tubulin  $s_\lambda$  and  $s_v$  are generally close to 0.5 as a result of

the 1:2 tubulin sequestering. For catastrophe-promoting stathmin,  $s_\lambda$  approaches the  $[T_0]$ -independent limit  $s_\lambda \approx \kappa_{\text{on}} d\omega_r/v_-k_c = 0.91$ , which is  $\gg 0.5$  (for more details, see the Supporting Material). The values  $s_\lambda$  and  $s_v$  are only weakly  $[T_0]$ -dependent, which motivates using the stathmin/tubulin  $s = s_{\text{on}}$  as a control parameter.

We find that constitutively active stathmin regulates MT growth in a switchlike manner for a fixed tubulin concentration  $[T_0]$  as characterized by the critical concentration  $S_\lambda$ , which is approximately linear in the tubulin concentration  $[T_0]$  for both models of stathmin action. Vice versa, we conclude that, at a fixed stathmin concentration  $S_{\text{tot}}$ , the tubulin concentration  $[T_0]$  can regulate MT growth in a switchlike manner with a critical concentration  $[T] \sim s_\lambda/S_{\text{tot}}$ , which can be controlled by the stathmin concentration  $S_{\text{tot}}$ . Without stathmin regulation, a critical tubulin concentration  $[T] = \kappa_{\text{on}}/\omega_{\text{off}}$  for MT growth at the plus-end exists, but this concentration is fixed by the rate constants of the growth velocity  $v_+$  appearing in Eq. 6. Moreover, the switchlike behavior becomes sharpened by stathmin regulation.

In vivo, the picture will be complicated if additional populations of treadmilling MTs exist apart from the end-anchored MTs, which we consider here. For tubulin-sequestering stathmin, treadmilling MTs will act as additional tubulin buffer. Upon sequestering by stathmin the length of treadmilling MTs will adjust such that the concentration of free tubulin is maintained at the critical concentration for treadmilling.

For a system that contains constitutively active stathmin and no Rac, the growth velocity  $v_+$  is homogeneous, and we always expect exponential MT length distributions as

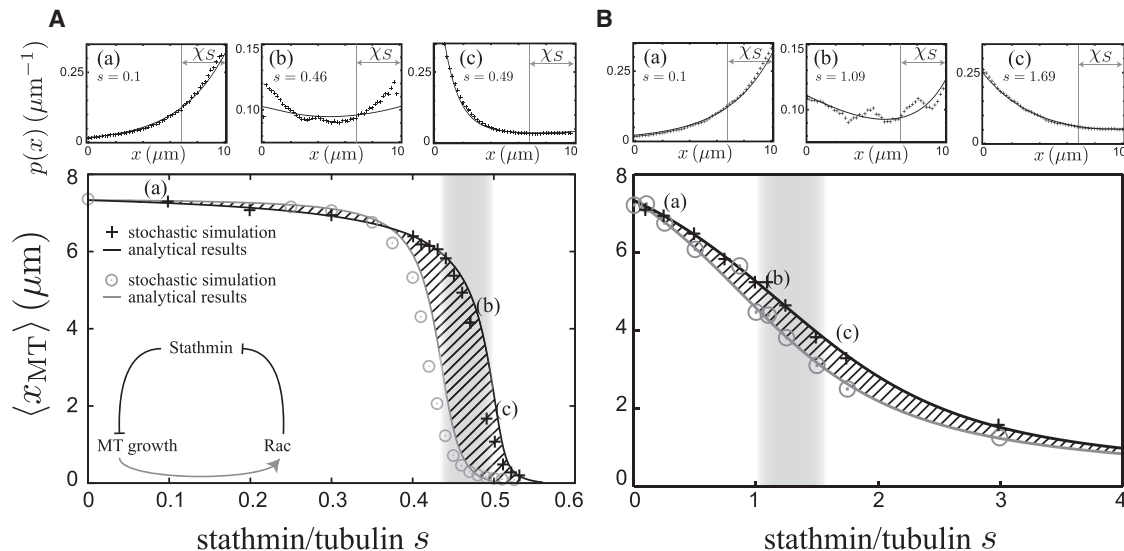

FIGURE 3 Stochastic simulation data (data points) and analytical master equation results (solid lines) for the mean MT length  $\langle x_{\text{MT}} \rangle$  as a function of stathmin/tubulin  $s = S_{\text{tot}}/[T_0]$ . We compare the system with constitutively active Rac ( $r_{\text{on}} = 1$ , solid lines and crosses) to the system without Rac ( $r_{\text{on}} = 0$ , shaded lines and circles) both for tubulin-sequestering stathmin (A) and catastrophe-promoting stathmin (B). (Hatched area) Possible MT length gain by Rac regulation. (Shaded area) Region in which MTs exhibit bimodal length distributions for constitutively active Rac. (Insets a–c) Corresponding MT length distributions for three particular values of  $s$  with (a)  $s < s_\lambda$ , (b)  $s = s_\lambda$ , and (c)  $s > s_\lambda$ .

in Eq. 1. In particular, we do not find bimodal MT length distributions in the absence of Rac (see also the Supporting Material).

### Interrupted feedback for constitutively active Rac

Now we reinstate Rac into our analysis of the feedback mechanism. We start with constitutively active Rac ( $r_{\text{on}} = 1$ ), which is analogous to interrupting the feedback between MTs and Rac by making the level of Rac activation independent of the cell-edge contacts of the MTs. Thus, we can limit the MT number to  $m = 1$  in this section.

Constitutively active Rac establishes a gradient of active stathmin, constant in time, which can be quantified by the analytical result from Eq. 11 with  $r_{\text{on}} = 1$ . As shown in the Supporting Material, it agrees very well with stochastic simulation results. The decreasing profile  $S_{\text{on}}(x)$  of activated stathmin is essential for MT length regulation because it leads to an increasing growth velocity  $v_x(x)$  (for tubulin-sequestering stathmin) and/or a decreasing catastrophe rate  $\omega_c(x)$  (for tubulin-sequestering and catastrophe-promoting stathmin), which modulates the MT length distribution.

We can calculate the MT length distribution starting from the negative stathmin gradient

$$s_{\text{on}}(x) = S_{\text{on}}(x)/[T_0] = s(S_{\text{on}}(x)/S_{\text{tot}})$$

(with the total stathmin/tubulin  $s = S_{\text{tot}}/[T_0]$ ) as given by Eq. 11. For tubulin-sequestering stathmin, this results in an increasing tubulin concentration of

$$[T](x) = [T_0]t(s_{\text{on}}(x))$$

through Eq. 14, which gives rise to both an increasing growth velocity  $v_+(x)$  according to Eq. 15 and a decreasing catastrophe rate  $\omega_c = \omega_c(v_+(x))$ . For catastrophe-promoting stathmin, only the catastrophe rate  $\omega_c = \omega_c(S_{\text{on}})$  becomes decreasing via Eq. 16. For both stathmin models, this results in an increasing inverse characteristic length parameter of

$$\lambda^{-1}(x) = \omega_r/v_- - \omega_c(x)/v_+(x)$$

(see Eq. 4). The master equations (Eqs. 1 and 2) then give the steady-state probability distribution for the MT length (51),

$$p(x) = p_+(x) + p_-(x) = N \left( 1 + \frac{v_-}{v_+(x)} \right) \exp \left( \int_0^x dx' / \lambda(x') \right), \quad (17)$$

with a normalization

$$N^{-1} = \int_0^L dx \left( 1 + \frac{v_-}{v_+(x)} \right) \exp \left( \int_0^x dx' / \lambda(x') \right).$$

In contrast to the system without Rac, position-dependent MT growth velocity and/or catastrophe rates can give rise to more complex MT length distributions because the decreasing profile  $S_{\text{on}}(x)$  of active stathmin gives rise to an inverse parameter  $\lambda^{-1}(x)$ , which is an increasing function of  $x$  for both stathmin models. The most interesting situation then arises if  $\lambda^{-1}(x)$  changes its sign on  $0 < x < L$ . Then, we find  $\lambda(x) < 0$  or MTs shrinking on average for small  $x$  and  $\lambda(x) > 0$  or MTs growing on average for large  $x$ . The decreasing profile  $S_{\text{on}}(x)$  of active stathmin thus leads to unstable MT growth because it promotes growth of long MTs, and shrinkage of short MTs. In fact, we find bimodal MT length distributions for this case as a result of the negative gradient or decreasing profile of active stathmin according to Eq. 11 (and see Fig. 3 insets, b).

These bimodal MT length distributions correspond to two populations of MTs: long fast-growing MTs and short collapsed MTs. The subpopulation of long fast-growing MTs resembles the experimentally observed long pioneering microtubules (32,36). Pioneering MTs have been observed to grow into the leading edge of migrating cells and exhibit a decreased catastrophe frequency. Because of the reduced growth velocity by deactivated stathmin, these are exactly the properties of the subpopulation of long MTs. We conclude that the bimodal MT length distribution occurring at high active Rac fractions can explain the phenomenon of pioneering MTs.

It is instructive to compare the impact of the decreasing active stathmin profile  $S_{\text{on}}(x)$  on the MT length distribution with the effect of an external force  $F(x)$ , which opposes MT growth and increases with  $x$ , for example, as for an elastic obstacle (51,54). Whereas an opposing force  $F(x)$ , which increases with  $x$ , gives rise to a decreasing growth velocity  $v_+(x)$  and a decreasing parameter  $\lambda^{-1}(x)$ , it is found that a decreasing profile  $S_{\text{on}}(x)$  always gives rise to an increasing parameter  $\lambda^{-1}(x)$ . This difference leads to very different behavior. For an opposing force  $F(x)$ , the MT length  $x_{\text{MT}}$  with  $\lambda^{-1}(x_{\text{MT}}) = 0$  represents a stable equilibrium: shorter MTs grow on average, whereas longer MTs shrink. Therefore, we find a pronounced maximum in the MT length distribution at  $x \sim x_{\text{MT}}$  (51,54). For stathmin-regulated MT growth, a decreasing profile  $S_{\text{on}}(x)$  leads to an unstable equilibrium as outlined above. As a result, we find a bimodal MT length distribution with a minimum in the MT length distribution around the MT length  $x_{\text{MT}}$  with  $\lambda^{-1}(x_{\text{MT}}) = 0$ .

In Fig. 3, we show the average length  $\langle x_{\text{MT}} \rangle$  of the MT as a function of the stathmin/tubulin  $s = S_{\text{tot}}/[T_0]$  for the two subsystems with constitutively active Rac (black lines and symbols) and without Rac (shaded lines and symbols) for both tubulin-sequestering and catastrophe-promoting stathmin. The black lines correspond to the analytical steady-state solution following the calculation outlined before; black data points are results from fully stochastic simulations. Also for active Rac, the total stathmin concentration

regulates MT growth in a switchlike manner, and we can define a critical stathmin concentration  $S_\lambda$  from the condition  $\langle x_{\text{MT}} \rangle (S_{\text{tot}} = S_\lambda) = L/2$ . The corresponding values are slightly higher than in the absence of Rac. We find bimodal MT length distributions for stathmin concentrations close to the critical value  $s_\lambda$  because the condition  $\langle x_{\text{MT}} \rangle = L/2$  implies that there exists an MT length  $x_{\text{MT}}$  with  $\lambda^{-1}(x_{\text{MT}}) = 0$ .

The deviation between the stochastic simulation results and the analytical master equation solution in Fig. 3 is due to fluctuations in the local concentration of active stathmin. Also in stochastic simulations, we find bimodal MT length distributions and, thus, pioneering MTs for stathmin/tubulin  $S_{\text{tot}}/[T_0]$  in the gray-shaded area in Fig. 3 around the critical value  $s_\lambda$ .

### Closed feedback

Now we consider the full system with closed feedback, where the activation of Rac proteins depends on cell-edge contacts of the MTs and changes with the number of MTs  $m$  in the system.

For the closed feedback loop, we expect that the average MT length will lie in between our results without Rac ( $r_{\text{on}} = 0$ ) and for full Rac activation ( $r_{\text{on}} = 1$ ), as indicated by the hatched areas in Fig. 3. For a closed regulation feedback loop, the system can vary the MT length between these two bounds, for example, by increasing the number  $m$  of MTs and, thus, the Rac activation level. The MT length is most sensitive to regulation in the vicinity of the switchlike behavior, i.e., for stathmin/tubulin  $S_{\text{tot}}/[T_0] \sim s_\lambda$ .

Using fully stochastic simulations we investigate the dependence of the mean MT length  $\langle x_{\text{MT}} \rangle$  on the number  $m$  of MTs for stathmin/tubulin  $S_{\text{tot}}/[T_0] \sim s_\lambda$  ( $s \approx 0.4\text{--}0.5$  for tubulin-sequestering stathmin and  $s \approx 1.0\text{--}1.5$  for catastrophe-promoting stathmin). The results are shown in Fig. 4. For a closed feedback loop, the mean MT length increases with the number  $m$  of MTs between the two bounds given by a system without Rac and a system with complete Rac activation, because the strength of the feedback increases

with  $m$  via the cell-edge contact probability as given by Eq. 7. If the MT contact probability is sufficiently high, the system will stabilize long MTs by Rac activation. For tubulin-sequestering stathmin, the average MT length increases linearly only above a critical number  $m_c$  of MTs. This critical number  $m_c$  increases with the stathmin concentration. For catastrophe-promoting stathmin, there is no critical number of MTs necessary, and the length increases gradually as a function of MT number  $m$ .

We can rationalize these results by the bifurcation behavior of the stationary state of the feedback system at the mean-field level, which is qualitatively different for tubulin-sequestering stathmin and catastrophe-promoting stathmin. For a fixed mean concentration  $r_{\text{on}}$  of activated Rac, we can follow the same steps as in the previous section to calculate the resulting stationary stathmin profile (Eq. 9) with an arbitrary  $0 \leq r_{\text{on}} \leq 1$  in Eq. 12 for the parameter  $A$  and, then, the steady-state probability distribution  $p(x)$  for the MT length (Eq. 15) given the velocity profile in Eq. 13. From  $p(x)$  we obtain the MT cell-edge contact probability  $p_{\text{MT}}$  in the stationary state using Eq. 9. All in all, we can calculate  $p_{\text{MT}}$  from any given fixed Rac activation level  $r_{\text{on}}$ . On the other hand, for a closed feedback loop, the MT contact probability  $p_{\text{MT}}$  feeds back and determines the Rac activation level  $r_{\text{on}}$  via Eq. 10 in the stationary state. At the stationary state of the closed feedback loop both relations have to be fulfilled simultaneously, which is only possible at certain fixed points of the feedback system.

For tubulin-sequestering stathmin, there are up to three fixed points, which exhibit two saddle-node bifurcations typical for a bistable switch (see the Supporting Material for more details). For small stathmin concentrations, there is only a single fixed point at a high level  $r_{\text{on}} \approx 1$  of active Rac, corresponding to upregulated MT growth resulting in a large mean MT length  $\langle x_{\text{MT}} \rangle$  and bistable length distributions, i.e., pioneering MTs. At this fixed point,  $\langle x_{\text{MT}} \rangle$  is described by the black curve in Fig. 3. For high stathmin concentrations, there exists only a single fixed point at low active Rac  $r_{\text{on}} \approx 0$ , corresponding to an interrupted feedback loop with short MTs. At this fixed point,  $\langle x_{\text{MT}} \rangle$

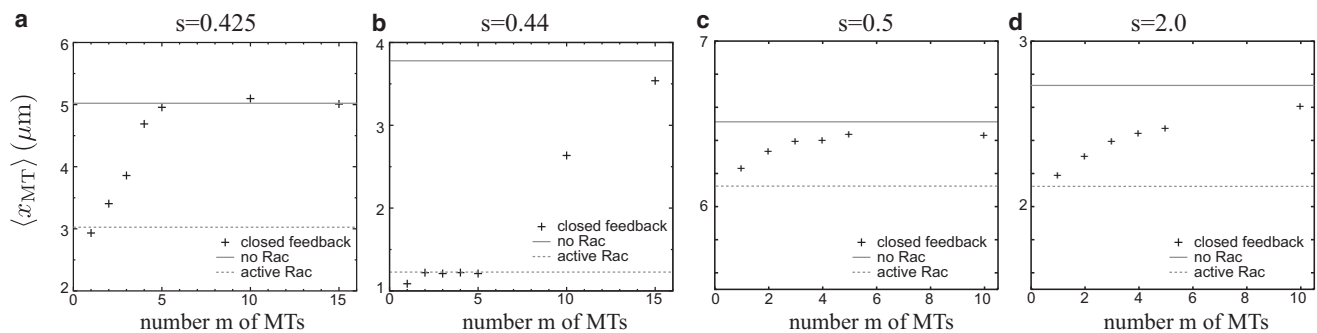

FIGURE 4 The average MT length  $\langle x_{\text{MT}} \rangle$  as a function of the number of MTs  $m$  in a system with closed feedback for tubulin-sequestering stathmin (a and b) and catastrophe-promoting stathmin (c and d) at different stathmin/tubulin  $s = S_{\text{tot}}/[T_0]$  values: (a)  $s = 0.425$ , (b)  $s = 0.44$ , (c)  $s = 0.5$ , and (d)  $s = 2.0$ . (Horizontal solid and dashed lines) Mean MT length for systems without Rac ( $r_{\text{on}} = 0$ ) and constitutively active Rac ( $r_{\text{on}} = 1$ ), respectively.



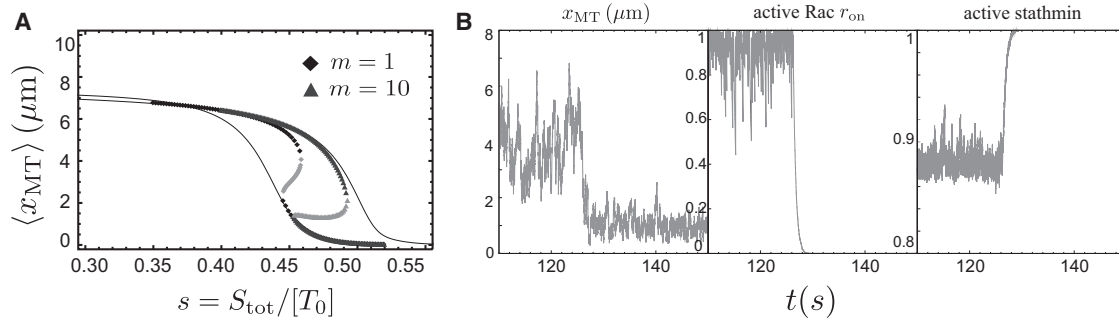

FIGURE 5 (A) Average MT length  $\langle x_{\text{MT}} \rangle$  at the fixed points as a function of stathmin/tubulin  $s = S_{\text{tot}}/[T_0]$  value for tubulin-sequestering stathmin (diamonds,  $m = 1$ ; triangles,  $m = 10$ ; gray, unstable fixed point). (Lines)  $\langle x_{\text{MT}} \rangle$  for a system without Rac (lower line,  $r_{\text{on}} = 0$ ) and for constitutively active Rac (upper line,  $r_{\text{on}} = 1$ ). (B) Time evolution of a feedback system with  $m = 1$  MT for tubulin-sequestering stathmin and  $x = 0.44$ . Plots show MT length, the fraction  $r_{\text{on}}$  of active Rac, and the total fraction of active stathmin  $L^{-1} \int_0^L dx S_{\text{on}}(x)/S_{\text{tot}}$  as a function of time. At  $t \sim 130$  s, the system switches from the high active Rac fixed point to an interrupted feedback fixed point.

is given by the shaded curve in Fig. 3. The upper critical stathmin/tubulin increases with the MT number  $m$ . In between, we find a hysteresis with three fixed points, one of which is unstable, corresponding to a bistable switch behavior. The hysteresis loop widens for increasing MT numbers  $m$ , which is why the critical  $m_c$  rises as a function of  $s$  (see Fig. 4). This also gives rise to hysteresis in the mean MT length, as shown in Fig. 5 A.

We conclude that for tubulin-sequestering stathmin, closure of the positive feedback mechanism leads to a bistable switch. This switch locks either into a high concentration of active Rac with upregulated MT growth and pioneering MTs, or into a low concentration of active Rac with quasi-interrupted feedback and short MTs. This bistable behavior requires a certain threshold value  $mk_{\text{on},R} > 1.9/\text{s}$  such that the feedback is strong enough. As of this writing, there is no experimental data for  $k_{\text{on},R}$ ; values  $k_{\text{on},R} < 1.9/\text{s}$  would require more than one MT to trigger bistability. In our model, this bistable switching behavior occurs even in the absence of a nonlinear Michaelis-Menten kinetics for stathmin phosphorylation because the dependence of the contact probability  $p_{\text{MT}}$  on the Rac activation level  $r_{\text{on}}$  is strongly nonlinear for tubulin-sequestering stathmin. The observed bifurcation is a stochastic bifurcation (of P-type) (55) in the sense that the MT length distribution undergoes a qualitative change at the bifurcation.

This bistability is also observed in our stochastic simulations for tubulin-sequestering stathmin (see Fig. 5 B), where stochastic fluctuations give rise to switching from the high active Rac fixed point ( $r_{\text{on}} \approx 1$ ) to an interrupted feedback at low active Rac ( $r_{\text{on}} \approx 0$ ). If we start in a state at the high Rac fixed point and the time between successive cell-edge contacts becomes comparable to the time constants  $k_{\text{off},R}$  for Rac deactivation and  $k_{\text{on},S}$  for stathmin reactivation, the feedback can be interrupted by stochastic fluctuations. Then the system falls into the low Rac fixed point, as can be seen in Fig. 5 at  $t \sim 130$  s. Because the

MT length distribution is exponentially decreasing at the low Rac fixed point, the reverse event of switching back to a high Rac value is improbable. Stochastic switching events as shown in Fig. 5 for  $m = 1$  MT become increasingly rare for large numbers  $m$  of MTs, which effectively stabilizes the fixed point of upregulated MT growth.

The main source of stochasticity is the growth dynamics of MTs and the resulting time-dependence of the contact probability: for small numbers  $m$ , the constant average value  $p_{\text{MT}}$  is only established as average over many contacts with relatively long times between successive contacts. Therefore, we expect the mean-field results to become correct only for large MT numbers  $m$ . For small  $m$ , we find pronounced stochastic effects. Furthermore, the gradual linear increase of  $\langle x_{\text{MT}} \rangle$  above the critical MT number  $m_c$  in Fig. 4 is the result of averaging bistable switching over many realizations.

For catastrophe-promoting stathmin, there is only a single fixed point, which explains the gradual upregulation of MT growth by the MT number  $m$ . The reason for the absence of any bistability is the strictly linear dependence of the inverse characteristic length parameter

$$\lambda^{-1}(x) = \omega_r/v_- - \omega_c(x)/v_+(x)$$

on the concentration of active stathmin (see Eqs. 4 and 16). This gives rise to a quasi-linear dependence of the contact probability  $p_{\text{MT}}$  on the Rac activation level  $r_{\text{on}}$  for catastrophe-promoting stathmin.

Our theoretical findings show the following:

1. Rac activation in the cell-edge region can establish the feedback, increase MT growth, and trigger MT pioneering behavior in accordance with experimental findings in Wittmann et al. (2), and
2. Surprisingly, simply increasing the number  $m$  of participating MTs can also upregulate growth of these MTs,

inasmuch as this increases the feedback strength and the level of active Rac.

## CONCLUSIONS

We formulated and investigated a theoretical model for the influence of a doubly negative feedback mechanism on MT growth involving the signaling proteins Rac1 and stathmin. MTs activate Rac1 in the cell-edge region; activated localized Rac1 inhibits stathmin, which freely diffuses in the cytosol and is an inhibitor for MT growth. We studied and compared two models for the MT inhibiting effect of stathmin, tubulin sequestering, and catastrophe promotion. The resulting positive feedback loop is of particular interest because of the prominent role spatial organization: MTs grow along a particular direction and stathmin organization along this direction is essential.

For high concentrations of active Rac1, our model produces a stathmin activation gradient, which leads to an increased mean MT length and bimodal MT length distributions. This explains the phenomenon of pioneering MTs that have been observed experimentally (32,36). We find bimodal MT length distributions both for tubulin-sequestering and for catastrophe-promoting stathmin. Our model shows that the stathmin activation gradient requires a local activation of Rac1 at the cell edge. Local Rac1 activation can happen by MT contacts for closed feedback, but an external local Rac1 activation should also trigger a stathmin activation gradient and, thus, pioneering MTs in accordance with experimental observations (32). Localized activation of other kinases that inactivate stathmin could have a similar effect, whereas stathmin-targeting kinases, which are active throughout the cytoplasm, will not give rise to stathmin activation gradients or pioneering MTs.

For constitutively active and inactive Rac1, we find a switchlike dependence of the mean MT length on the overall concentration ratio of stathmin to tubulin. We find such a switchlike dependence both for tubulin-sequestering and catastrophe-promoting stathmin with a characteristically steeper switch for tubulin-sequestering stathmin. This qualitative difference between tubulin-sequestering and catastrophe-promoting stathmin should be amenable to experimental testing, which might help to settle the yet-unresolved question of the MT-inhibiting mechanism of stathmin.

The positive feedback mechanism involving Rac1 and stathmin allows us to upregulate MT growth within the bounds set by constitutively active and inactive Rac1. Based on our theoretical model, we predict a qualitatively different effect of the positive feedback for tubulin-sequestering and catastrophe-promoting stathmin. For tubulin-sequestering stathmin, we identify a bistable switch with two stable fixed points within a mean-field theory. One fixed point corresponds to high active Rac1, upregulated MT mean length, and bimodal MT length distributions, i.e., pioneering MTs;

the other fixed point corresponds to an interrupted feedback at low active Rac1 concentrations, with short MTs. Stochastic fluctuations can give rise to spontaneous stochastic switching events, which we also observed in simulations.

Interestingly, we find bistable switching behavior even in the absence of a nonlinear Michaelis-Menten kinetics for stathmin phosphorylation. The bistability is due to nonlinear dependencies of the MT cell-edge contact probability on the active Rac1 concentration via the free tubulin concentration and the stathmin concentration. For catastrophe-promoting stathmin, this nonlinearity is absent and we find a gradual increase of MT length by the positive feedback mechanism. These qualitative differences between tubulin-sequestering and catastrophe-promoting stathmin in the theoretical model could give important indications for experiments to resolve the issue of the mechanism of MT growth inhibition by stathmin: experimental observations of bistability would clearly hint toward the tubulin-sequestering mechanism.

We checked that all of our results are robust against changes of the catastrophe model and the cell length  $L$  (see the [Supporting Material](#)). Based on our model, we suggest three mechanisms to influence the overall MT growth behavior or the Rac1-induced upregulation of MT growth in vivo or by external perturbation in experiments:

1. The overall MT length can be controlled via the total tubulin or stathmin concentrations. Raising the tubulin concentration or lowering the stathmin concentration upregulates MT growth.
2. Rac1 activation in the cell-edge region increases MT growth and can trigger pioneering MTs.
3. Increasing the number  $m$  of participating MTs can also increase MT growth and trigger pioneering MTs.

All of these mechanisms should be accessible in perturbation experiments. Moreover, our results on MT length distributions can be checked against future quantitative length measurements on pioneering MTs.

Our results have implications for the polarization of the MT cytoskeleton as well. In a population of MTs growing in different directions, the investigated positive feedback mechanism via Rac1 and stathmin regulation can select and amplify a certain MT growth direction, such as one triggered by a locally increased Rac1 concentration in the cell-edge region. This issue remains to be investigated in the future.

## SUPPORTING MATERIAL

Supporting materials and Methods, thirteen equations, and seven figures are available at [http://www.biophysj.org/biophysj/supplemental/S0006-3495\(14\)01145-X](http://www.biophysj.org/biophysj/supplemental/S0006-3495(14)01145-X).

We thank Björn Zelinski, Susann El-Kassar, and Leif Dehmelt for fruitful discussions.

We acknowledge support by the Deutsche Forschungsgemeinschaft (grant No. KI 662/4-1).

## SUPPORTING CITATIONS

References (56,57) appear in the [Supporting Material](#).

## REFERENCES

- Mitchison, T. J., and E. D. Salmon. 2001. Mitosis: a history of division. *Nat. Cell Biol.* 3:E17–E21.
- Dogterom, M., J. W. J. Kerssemakers, ..., M. E. Janson. 2005. Force generation by dynamic microtubules. *Curr. Opin. Cell Biol.* 17:67–74.
- Daga, R. R., A. Yonetani, and F. Chang. 2006. Asymmetric microtubule pushing forces in nuclear centering. *Curr. Biol.* 16:1544–1550.
- Siegrist, S. E., and C. Q. Doe. 2007. Microtubule-induced cortical cell polarity. *Genes Dev.* 21:483–496.
- Picone, R., X. Ren, ..., B. Baum. 2010. A polarized population of dynamic microtubules mediates homeostatic length control in animal cells. *PLoS Biol.* 8:e1000542.
- Waterman-Storer, C. M., R. A. Worthylyake, ..., E. D. Salmon. 1999. Microtubule growth activates Rac1 to promote lamellipodial protrusion in fibroblasts. *Nat. Cell Biol.* 1:45–50.
- Dehmelt, L., F. M. Smart, ..., S. Halpain. 2003. The role of microtubule-associated protein 2c in the reorganization of microtubules and lamellipodia during neurite initiation. *J. Neurosci.* 23:9479–9490.
- Mitchison, T., and M. Kirschner. 1984. Dynamic instability of microtubule growth. *Nature.* 312:237–242.
- Howard, J., and A. A. Hyman. 2007. Microtubule polymerases and depolymerases. *Curr. Opin. Cell Biol.* 19:31–35.
- Tolić-Nørrellykke, I. M. 2010. Force and length regulation in the microtubule cytoskeleton: lessons from fission yeast. *Curr. Opin. Cell Biol.* 22:21–28.
- Brun, L., B. Rupp, ..., F. Nédélec. 2009. A theory of microtubule catastrophes and their regulation. *Proc. Natl. Acad. Sci. USA.* 106:21173–21178.
- Tischer, C., P. R. Ten Wolde, and M. Dogterom. 2010. Providing positional information with active transport on dynamic microtubules. *Biophys. J.* 99:726–735.
- Reese, L., A. Melbinger, and E. Frey. 2011. Crowding of molecular motors determines microtubule depolymerization. *Biophys. J.* 101:2190–2200.
- Melbinger, A., L. Reese, and E. Frey. 2012. Microtubule length regulation by molecular motors. *Phys. Rev. Lett.* 108:258104.
- Johann, D., C. Erlenkämper, and K. Kruse. 2012. Length regulation of active biopolymers by molecular motors. *Phys. Rev. Lett.* 108:258103.
- Kraynov, V. S., C. Chamberlain, ..., K. M. Hahn. 2000. Localized Rac activation dynamics visualized in living cells. *Science.* 290:333–337.
- Wittmann, T., and C. M. Waterman-Storer. 2001. Cell motility: can Rho GTPases and microtubules point the way? *J. Cell Sci.* 114:3795–3803.
- Kjoller, L., and A. Hall. 1999. Signaling to Rho GTPases. *Exp. Cell Res.* 253:166–179.
- Moissoglu, K., B. M. Slepchenko, ..., M. A. Schwartz. 2006. In vivo dynamics of Rac-membrane interactions. *Mol. Biol. Cell.* 17:2770–2779.
- Athale, C. A., A. Dinarina, ..., E. Karsenti. 2008. Regulation of microtubule dynamics by reaction cascades around chromosomes. *Science.* 322:1243–1247.
- Desai, A., and T. J. Mitchison. 1997. Microtubule polymerization dynamics. *Annu. Rev. Cell Dev. Biol.* 13:83–117.
- Cassimeris, L. 2002. The oncoprotein 18/stathmin family of microtubule destabilizers. *Curr. Opin. Cell Biol.* 14:18–24.
- Gupta, K. K., C. Li, ..., H. V. Goodson. 2013. Mechanism for the catastrophe-promoting activity of the microtubule destabilizer Op18/stathmin. *Proc. Natl. Acad. Sci. USA.* 110:20449–20454.
- Carlier, M.-F. 2007. Measurements of stathmin-tubulin interaction in solution. *Methods Mol. Med.* 137:103–110.
- Jourdain, L., P. Curmi, ..., M. F. Carlier. 1997. Stathmin: a tubulin-sequestering protein which forms a ternary T2S complex with two tubulin molecules. *Biochemistry.* 36:10817–10821.
- Curmi, P. A., S. S. Andersen, ..., A. Sobel. 1997. The stathmin/tubulin interaction in vitro. *J. Biol. Chem.* 272:25029–25036.
- Howell, B., N. Larsson, ..., L. Cassimeris. 1999. Dissociation of the tubulin-sequestering and microtubule catastrophe-promoting activities of oncoprotein 18/stathmin. *Mol. Biol. Cell.* 10:105–118.
- Wittmann, T., G. M. Bokoch, and C. M. Waterman-Storer. 2004. Regulation of microtubule destabilizing activity of Op18/stathmin downstream of Rac1. *J. Biol. Chem.* 279:6196–6203.
- Watanabe, T., J. Noritake, and K. Kaibuchi. 2005. Regulation of microtubules in cell migration. *Trends Cell Biol.* 15:76–83.
- Sells, M. A., A. Pfaff, and J. Chernoff. 2000. Temporal and spatial distribution of activated Pak1 in fibroblasts. *J. Cell Biol.* 151:1449–1458.
- Niethammer, P., P. Bastiaens, and E. Karsenti. 2004. Stathmin-tubulin interaction gradients in motile and mitotic cells. *Science.* 303:1862–1866.
- Wittmann, T., G. M. Bokoch, and C. M. Waterman-Storer. 2003. Regulation of leading edge microtubule and actin dynamics downstream of Rac1. *J. Cell Biol.* 161:845–851.
- Küntziger, T., O. Gavet, ..., M. Bornens. 2001. Stathmin/Op18 phosphorylation is regulated by microtubule assembly. *Mol. Biol. Cell.* 12:437–448.
- Li, S., J.-L. Guan, and S. Chien. 2005. Biochemistry and biomechanics of cell motility. *Annu. Rev. Biomed. Eng.* 7:105–150.
- Dehmelt, L., and P. I. H. Bastiaens. 2010. Spatial organization of intracellular communication: insights from imaging. *Nat. Rev. Mol. Cell Biol.* 11:440–452.
- Waterman-Storer, C. M., and E. D. Salmon. 1997. Actomyosin-based retrograde flow of microtubules in the lamella of migrating epithelial cells influences microtubule dynamic instability and turnover and is associated with microtubule breakage and treadmilling. *J. Cell Biol.* 139:417–434.
- Drechsel, D. N., A. A. Hyman, ..., M. W. Kirschner. 1992. Modulation of the dynamic instability of tubulin assembly by the microtubule-associated protein tau. *Mol. Biol. Cell.* 3:1141–1154.
- Gildersleeve, R. F., A. R. Cross, ..., R. C. Williams, Jr. 1992. Microtubules grow and shorten at intrinsically variable rates. *J. Biol. Chem.* 267:7995–8006.
- Walker, R. A., E. T. O'Brien, ..., E. D. Salmon. 1988. Dynamic instability of individual microtubules analyzed by video light microscopy: rate constants and transition frequencies. *J. Cell Biol.* 107:1437–1448.
- Janson, M. E., and M. Dogterom. 2004. Scaling of microtubule force-velocity curves obtained at different tubulin concentrations. *Phys. Rev. Lett.* 92:248101.
- Pryer, N. K., R. A. Walker, ..., E. D. Salmon. 1992. Brain microtubule-associated proteins modulate microtubule dynamic instability in vitro. Real-time observations using video microscopy. *J. Cell Sci.* 103:965–976.
- Nakao, C., T. J. Itoh, ..., N. Mori. 2004. Modulation of the stathmin-like microtubule destabilizing activity of RB3, a neuron-specific member of the SCG10 family, by its N-terminal domain. *J. Biol. Chem.* 279:23014–23021.
- Haeusler, L. C., L. Hemsath, ..., M. R. Ahmadian. 2006. Purification and biochemical properties of Rac1, 2, 3 and the splice variant Rac1b. *Methods Enzymol.* 406:1–11.
- Haeusler, L. C., L. Blumenstein, ..., M. R. Ahmadian. 2003. Comparative functional analysis of the Rac GTPases. *FEBS Lett.* 555:556–560.
- Schubart, U. K., W. Alago, Jr., and A. Danoff. 1987. Properties of p19, a novel cAMP-dependent protein kinase substrate protein purified from bovine brain. *J. Biol. Chem.* 262:11871–11877.

46. Redeker, V., S. Lachkar, ..., P. A. Curmi. 2000. Probing the native structure of stathmin and its interaction domains with tubulin. Combined use of limited proteolysis, size exclusion chromatography, and mass spectrometry. *J. Biol. Chem.* 275:6841–6849.
47. Honnappa, S., B. Cutting, ..., M. O. Steinmetz. 2003. Thermodynamics of the Op18/stathmin-tubulin interaction. *J. Biol. Chem.* 278:38926–38934.
48. Amayed, P., D. Pantaloni, and M. F. Carlier. 2002. The effect of stathmin phosphorylation on microtubule assembly depends on tubulin critical concentration. *J. Biol. Chem.* 277:22718–22724.
49. Verde, F., M. Dogterom, ..., S. Leibler. 1992. Control of microtubule dynamics and length by cyclin A- and cyclin B-dependent kinases in *Xenopus* egg extracts. *J. Cell Biol.* 118:1097–1108.
50. Dogterom, M., and S. Leibler. 1993. Physical aspects of the growth and regulation of microtubule structures. *Phys. Rev. Lett.* 70:1347–1350.
51. Zelinski, B., N. Müller, and J. Kierfeld. 2012. Dynamics and length distribution of microtubules under force and confinement. *Phys. Rev. E Stat. Nonlin. Soft Matter Phys.* 86:041918.
52. Janson, M. E., M. E. de Dood, and M. Dogterom. 2003. Dynamic instability of microtubules is regulated by force. *J. Cell Biol.* 161:1029–1034.
53. Brown, G. C., and B. N. Kholodenko. 1999. Spatial gradients of cellular phospho-proteins. *FEBS Lett.* 457:452–454.
54. Zelinski, B., and J. Kierfeld. 2013. Cooperative dynamics of microtubule ensembles: polymerization forces and rescue-induced oscillations. *Phys. Rev. E Stat. Nonlin. Soft Matter Phys.* 87:012703.
55. Zakharova, A., T. Vadivasova, ..., J. Kurths. 2010. Stochastic bifurcations and coherencelike resonance in a self-sustained bistable noisy oscillator. *Phys. Rev. E Stat. Nonlin. Soft Matter Phys.* 81:011106.
56. Flyvbjerg, H., T. E. Holy, and S. Leibler. 1996. Microtubule dynamics: caps, catastrophes, and coupled hydrolysis. *Phys. Rev. E Stat. Phys. Plasmas Fluids Relat. Interdiscip. Topics.* 54:5538–5560.
57. Li, X., J. Kierfeld, and R. Lipowsky. 2009. Actin polymerization and depolymerization coupled to cooperative hydrolysis. *Phys. Rev. Lett.* 103:048102.

# Supporting Material:

## Feedback mechanism for microtubule length regulation by bistable stathmin gradients

Maria Zeitz, Jan Kierfeld

Physics Department, TU Dortmund University,  
44221 Dortmund, Germany

November 27, 2014

The Supporting Material contains details of the simulation methods for the feedback system of polymerizing microtubules, localized Rac1 and cytosolic stathmin. We also present additional model equations and simulation results on the stathmin activation gradient. We show additional results on the interrupted feedback subsystem without Rac and constitutively active stathmin. For the full system with closed feedback, we present details of the theoretical bifurcation analysis. Finally, we present additional results on the robustness of our results with respect to changes in the catastrophe model and the system length.

### 1 Simulation methods

The model described in the main text is the basis for our one-dimensional stochastic simulation. We employ a stochastic simulation with equal time steps  $\Delta t = 0.001\text{s}$ , i.e., the simulation time is discretized into equidistant discrete times  $t_n = n\Delta t$ . We model the MTs as straight polymers with continuous length, and Rac and Stathmin distributions via discrete particles, which can be activated and deactivated according to the rates specified in the main text. Stathmin particles can diffuse freely within the simulation box, whereas Rac particles are localized at the cell-edge region.

In Table 2 in the main text we present our choice of parameters to perform simulations. We assume a tubulin concentration  $[T_0] = 19.4\mu\text{M}$ , and we assign a volume  $0.86\mu\text{m}^3$  to our simulation box, which is equivalent to a total number of  $N_T = 10000$  tubulin dimers in the simulation box. We choose a simulation box of length  $L = 10\mu\text{m}$  with a cell-edge region of size  $\delta = 20\text{nm}$ , where Rac can be activated by MTs.

## 1.1 Microtubule simulation

In order to simulate one single MT in a box, we use the following approximations:

- 1) The MT is rigid and grows and shrinks in only one direction, along the  $x$ -axis. The MT tip position is described by a continuous variable  $x_{\text{MT}}$ .
- 2) The one-dimensional box has fixed rigid walls at  $x = 0, L$ . At  $x_{\text{MT}} = L$  (the cell edge), a growing MT experiences an immediate catastrophe event. For simplicity, we assume that at  $x_{\text{MT}} = 0$ , a shrinking MT starts to grow again.
- 3) Tubulin is not simulated explicitly. The interaction with stathmin is implemented indirectly by a change of the growth velocity via the concentration  $[T]$  of free tubulin following Eq. (6) in the main text. The total number  $N_T = 10000$  of tubulin dimers is only needed to calculate values of stathmin/tubulin  $s = S/[T_0] = N_S/N_T$  conveniently.

The MT is completely described by the position  $x_{\text{MT}}$  of the tip and its growth state (growing or shrinking). The switching of the MT state is described as a stochastic event with the time constant probabilities for catastrophe  $p_c = \omega_c \Delta t$  and rescue  $p_r = \omega_r \Delta t$  in each time step. Whereas the rescue rate  $\omega_r$  is always independent of the MT tip position  $x_{\text{MT}}$ , the catastrophe rate  $\omega_c(x_{\text{MT}})$  becomes a function of  $x_{\text{MT}}$  in the presence of a stathmin concentration profile as further explained below. If the MT has grown in the last time step and a random number  $c \in [0; 1]$  is smaller than  $p_c$ , then the MT shrinks in the current time step, and if  $c > p_c$  the MT continues to grow (and vice versa). The new coordinate is

$$x_{\text{MT},n+1} = x_{\text{MT},n} + v_{+,n} \Delta t \quad \text{or} \quad x_{\text{MT},n+1} = x_{\text{MT},n} - v_- \Delta t \quad (\text{S1})$$

for growing or shrinking respectively. At the boundary of the simulation box for positions  $x_{\text{MT}} > L$  a catastrophe is enforced,  $p_c = 1$ , and for  $x_{\text{MT}} < 0$ , we enforce immediate rescue,  $p_r = 1$ . The growth velocity  $v_{+,n}$  depends on the local concentration of free tubulin at  $x_{\text{MT},n}$  via Eq. (6) in the main text and, for tubulin-sequestering stathmin, on the local concentration of active stathmin via Eq. (14) in the main text.

In general, we perform simulations with  $m$  MTs, in a sufficiently big ensemble (in average 100 independent systems compose an ensemble). In order to minimize fluctuations, the observables are measured in the steady state and averaged over sufficiently large time intervals.

In order to measure the length distribution, i.e., the probability to find a MT of length  $x$  during the simulation, we divide the box into bins of the length  $\Delta L$  and typically use  $\Delta L = L/50$ .

## 1.2 Rac simulation

The  $N_R$  Rac proteins are described as point-like objects which are all situated in the right boundary at  $x = L$ , which represents the cell edge. In each simulation time step  $\Delta t$ , each

Rac protein is deactivated with the constant probability  $p_{\text{off,R}} = k_{\text{off,R}}\Delta t$ . If a Rac protein is active, we draw a random number  $c \in [0; 1]$ ; if  $c$  is smaller than  $p_{\text{off,R}}$  it is deactivated in the following time step.

In order to activate Rac, a membrane contact of the MT is necessary. If one of the  $m$  MTs is at the cell edge region, each Rac protein is activated with a probability  $p_{\text{on,R}} = k_{\text{on,R}}\Delta t$  in each time step  $\Delta t$ . If one MT is at the position  $x_{\text{MT}} \in [L - \delta; L]$  and a random number  $c \in [0; 1]$  is smaller than  $p_{\text{on,R}}$  the protein is activated in the next time step. Since the details of the Rac activation are not known, we include  $\delta \ll L$  as a reaction distance.

### 1.3 Stathmin simulation

The  $N_S$  stathmin proteins are point-like objects which diffuse freely within the one-dimensional box  $x \in [0, L]$ . The probability density function for the distance  $\Delta x$  that a diffusing particle moves in a simulation time step  $\Delta t$  is a Gauss distribution

$$p(\Delta x, \Delta t) = \frac{1}{\sqrt{4\pi D\Delta t}} e^{-\frac{\Delta x^2}{4D\Delta t}}. \quad (\text{S2})$$

The mean square distance a particle moves during the time step  $\Delta t$  is  $\langle \Delta x^2 \rangle = 2D\Delta t$ . We determine the new position of a stathmin protein (index  $j$ ) as

$$x_{j,n+1} = x_{j,n} + d\sqrt{2D\Delta t}, \quad (\text{S3})$$

where  $d$  denotes a random number drawn from a standard normal distribution. using a Box-Muller algorithm. The position  $x_{j,n} \in [0; L]$  is limited to the box by reflecting boundary conditions.

We activate each stathmin protein regardless of its position within the cell with the probability  $p_{\text{on,S}} = k_{\text{on,S}}\Delta t$  in each simulation time step  $\Delta t$ . This is implemented by comparison of  $p_{\text{on,S}}$  with a random number  $c \in [0; 1]$ . The deactivation of a stathmin protein, on the other hand, only takes place if it is positioned in the interval  $[L - \delta; L]$ . Then, it is deactivated with the probability  $p_{\text{off,S}} = r_{\text{on}}k_{\text{off,S}}\Delta t$ , with  $r_{\text{on}}$  being the fraction of active Rac proteins at this time step. Activation and deactivation are implemented by comparison of  $p_{\text{on,S}}$  and  $p_{\text{off,S}}$ , respectively, with a random number  $c \in [0; 1]$ .

We compare two mechanisms for the inhibition of MT growth by stathmin: (a) tubulin sequestering by stathmin resulting in reduced free tubulin concentrations, reduced MT growth velocities, and increased MT catastrophe rates and (b) a purely MT catastrophe-promoting activity of stathmin.

For both mechanisms, we measure the local concentration  $S_{\text{on}}(x)$  of active stathmin during the simulation, in order to simulate the local impact of stathmin on the growth velocity of a MT with tip position  $x$ . In order to define and measure the local concentration  $S_{\text{on}}(x)$  of active stathmin during the simulation, we divide the box into bins of the length

$\Delta L$  and count the active and inactive stathmin proteins. Because we choose  $\Delta L$  much smaller than the stathmin gradient scale  $\chi_S$ , see (S8) below, the total number of stathmin proteins is nearly constant in each bin. Typically, we choose  $\Delta L = L/50$ .

### 1.3.1 Tubulin-sequestering stathmin

For the tubulin-sequestering model of stathmin, we do not simulate the binding of tubulin dimers to stathmin explicitly but assume that the binding to stathmin is fast compared to the other processes. Therefore, we can determine the local concentration  $t(s_{\text{on}}(x))$  of free tubulin from the local concentration of active stathmin  $s_{\text{on}}(x) = S_{\text{on}}(x)/[T_0]$  via the chemical equilibrium relation (14) for a fixed total tubulin concentration  $[T_0]$  corresponding a number  $N_T = [T_0]V$  of tubulin dimers in a volume  $V$ . Once we know the local concentration  $[T](x) = [T_0]t(s_{\text{on}}(x))$  of free tubulin, Eq. (6) in the main text determines the local growth velocity,

$$v_+ = v_+([T](x)) = v_+([T_0]t(s_{\text{on}}(x))) \quad (\text{S4})$$

(see Eq. (15) in the main text). This quasi-equilibrium relation allows us to determine the local MT growth velocity  $v_+ = v_+(x)$  uniquely from the local concentration  $S_{\text{on}}(x)$  of active stathmin.

Because the catastrophe rate  $\omega_c$  is determined by  $v_+ = v_+(x)$  via relation (7) in the main text, a local growth velocity also gives rise to a local catastrophe rate  $\omega_c = \omega_c(v_+(x))$  in the tubulin-sequestering model of stathmin.

### 1.3.2 Catastrophe-promoting stathmin

For the catastrophe-promoting model of stathmin, the local concentration  $S_{\text{on}}(x)$  of active stathmin does not affect the MT growth velocity  $v_+$  but directly the catastrophe rate via the relation (16) in the main text. This gives rise to a local catastrophe rate  $\omega_c = \omega_c(S_{\text{on}}(x))$ .

## 2 Gradient in stathmin activation

The interplay of stathmin diffusion and phosphorylation by active Rac at the cell edge establishes a spatial gradient of stathmin activation, for which we provide a detailed mathematical model here.

Stathmin proteins are either in an active dephosphorylated state with concentration profile  $S_{\text{on}}(x)$  or in an inactive phosphorylated state with concentration profile  $S_{\text{off}}(x)$  (with a total stathmin concentration  $S_{\text{tot}}(x) = S_{\text{on}}(x) + S_{\text{off}}(x)$ ). In both states, stathmin diffuses freely within the model box  $x \in [0; L]$  with a constant diffusion coefficient  $D$ , which is equal for both states. Switching between active and inactive state is a stochastic process with rates  $k_{\text{on,S}}$  and  $k_{\text{off,S}}$ .



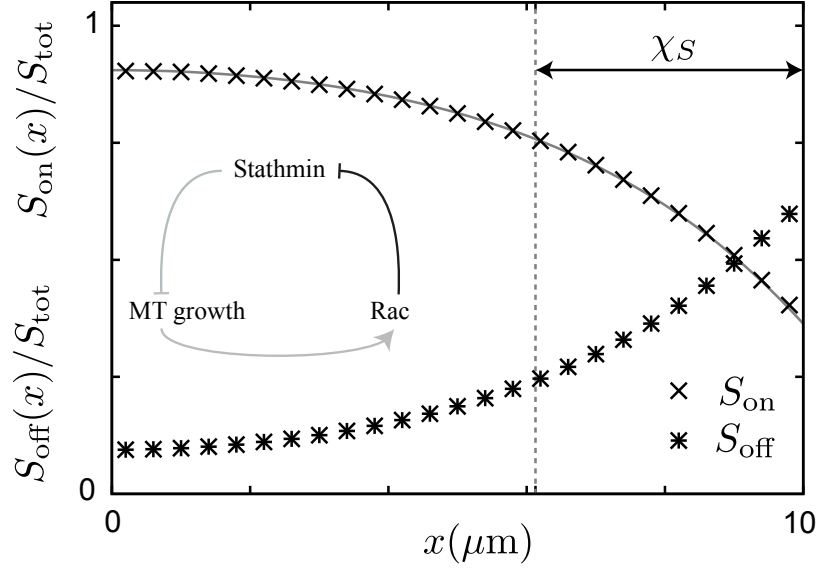

Figure S1: Spatial gradient of stathmin activation for constitutively active Rac. Data points show results from stochastic simulations, lines the analytical result (11) (for  $r_{\text{on}} = 1$ ). Parameters are as in Table 2 in the main text resulting in  $\chi_S \simeq 3.87 \mu\text{m}$ . There are no fit parameters.

Moreover, active Rac deactivates stathmin at the cell edge  $x = L$  as simple second order reaction with a rate proportional to  $r_{\text{on}}$ . The resulting chemical kinetics for the boundary value  $S_{\text{off}}(L)$  (strictly speaking the values in the cell-edge region  $[L - \delta, L]$ ) including diffusion away from the cell edge can then be described by

$$\frac{\partial S_{\text{off}}(L)}{\partial t} = -\frac{D}{\delta} \frac{\partial S_{\text{off}}}{\partial x} \Big|_{x=L} + k_{\text{off},S} r_{\text{on}} S_{\text{on}}(L) - k_{\text{on},S} S_{\text{off}}(L). \quad (\text{S5})$$

We assume that the phosphatase responsible for stathmin activation is homogeneously distributed within the cytosol such that stathmin dephosphorylates everywhere within the box with the constant rate  $k_{\text{on},S}$  (1) (which depends on the concentration of the homogeneously distributed stathmin phosphatase). The distribution of deactivated stathmin in the one-dimensional box is then described by the reaction-diffusion equation

$$\frac{\partial S_{\text{off}}}{\partial t} = D \frac{\partial^2 S_{\text{off}}}{\partial x^2} - k_{\text{on},S} S_{\text{off}}. \quad (\text{S6})$$

This equation is complemented by the boundary condition (S5) for  $S_{\text{off}}(L)$  and by a zero diffusive flux condition  $D \partial S_{\text{off}} / \partial x|_{x=0} = 0$  at  $x = 0$ . The distribution of active stathmin  $S_{\text{on}}(x)$  can be obtained analogously (using also  $S_{\text{tot}}(x) = S_{\text{on}}(x) + S_{\text{off}}(x)$ ).

Equations (S6) and (S5) describe the stathmin kinetics at the mean-field level; equation (S5) neglects temporal correlations between Rac and stathmin number fluctuations. by using the mean fraction  $r_{\text{on}}$  in the deactivation process.

In the steady state, the time derivatives in (S5) and (S6) vanish, and the total stathmin concentration  $S_{\text{tot}} = S_{\text{on}}(x) + S_{\text{off}}(x) = \text{const}$  becomes homogeneous due to diffusion. The corresponding stationary solution of (S5) and (S6) for the stathmin activation gradient is

$$\frac{S_{\text{on}}(x)}{S_{\text{tot}}} = 1 - 2A \cosh(x/\chi_S), \quad (\text{S7})$$

see Eq. (11) in the main text, with the characteristic decay length

$$\chi_S = \sqrt{D/k_{\text{on},S}}. \quad (\text{S8})$$

The integration constant  $A$  depends on the degree of stathmin deactivation by Rac at the cell edge  $x = L$  and, thus, on the fraction  $r_{\text{on}}$  of activated Rac. For a fixed level  $r_{\text{on}}$  of Rac activation, we find

$$A = \frac{1}{2} \frac{r_{\text{on}} k_{\text{off},S}}{(D/\delta\chi_S) \sinh(L/\chi_S) + (r_{\text{on}} k_{\text{off},S} + k_{\text{on},S}) \cosh(L/\chi_S)}, \quad (\text{S9})$$

see also Eq. (12) in the main text.

We can compare the analytical result (S7) for the concentration profile of active stathmin at a fixed fraction  $r_{\text{on}}$  of active Rac in Eq. (S9) with stochastic simulation results for a fixed level  $r_{\text{on}}$  of Rac activation (i.e., keeping  $N_R r_{\text{on}}$  of  $N_R$  Rac proteins in the simulation permanently in the activated state). In Fig. S1, we show this comparison for a subsystem with constitutively active Rac corresponding to  $r_{\text{on}} = 1$  in Eq. (S9) and see very good agreement without any adjustable fit parameters.

### 3 Interrupted feedback for constitutively active stathmin in the absence of Rac

In this section, we present additional results on MT length distributions for a subsystem without Rac, i.e., with constitutively active stathmin.

Without Rac, the constitutively active stathmin is homogeneously distributed,  $S_{\text{tot}} = S_{\text{on}} = \text{const}$ . Therefore, also the length parameter  $\lambda$  is constant, see Eq. (4) in the main text, and the MT mean length is given by Eq. (5) in the main text.

Fig. S2 shows results for the mean MT length  $\langle x_{\text{MT}} \rangle$  as a function of stathmin/tubulin  $s = S_{\text{tot}}/[T_0]$ , and insets show the corresponding MT length distribution at three different stathmin/tubulin  $s$ . Fig. S2 (A) shows results for tubulin-sequestering stathmin, Fig. S2 (B) for catastrophe-promoting stathmin. We find good agreement between the analytical

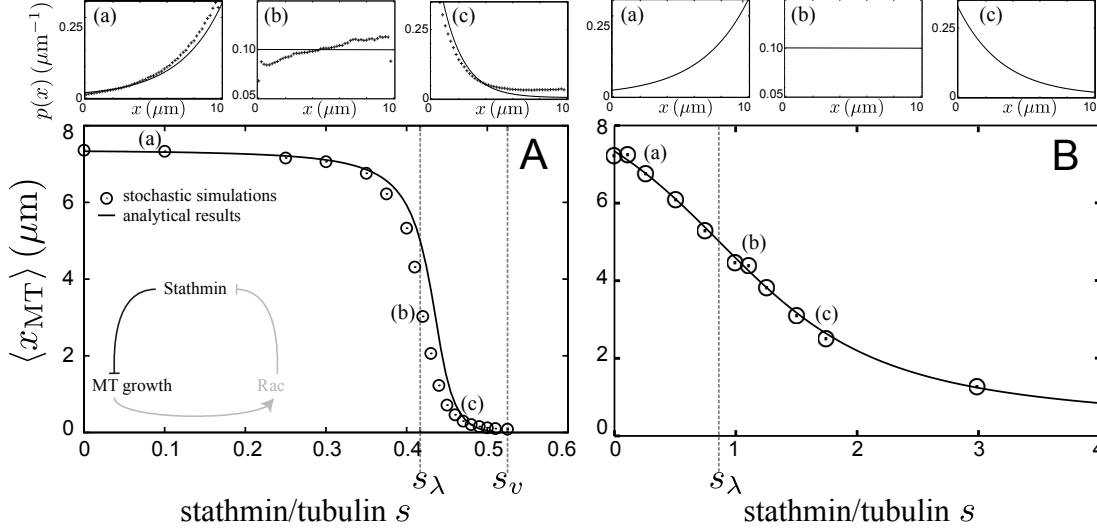

Figure S2: Stochastic simulation data and analytical master equations results for the system without Rac ( $r_{\text{on}} = 0$ ) and constitutively active stathmin for tubulin-sequestering stathmin (A) and catastrophe-promoting stathmin (B). We show results for the mean MT length  $\langle x_{\text{MT}} \rangle$  in the steady state as a function of stathmin/tubulin  $s = S_{\text{tot}}/[T_0]$ . The black curves correspond to the analytical result Eq. (5) in the main text, black symbols to stochastic simulation results. The critical concentrations  $s_\lambda$  and  $s_v$  are indicated. The insets (a), (b), (c) show MT length distributions for three particular values of  $s$ , which are also indicated in the main plot, with (a)  $s < s_\lambda$ , (b)  $s = s_\lambda$  and (c)  $s > s_\lambda$ ; curves are the analytical result Eq. (3) in the main text, symbols are stochastic simulation results.

result (5) from the main text (lines) and stochastic simulation results (data points) both for tubulin-sequestering and catastrophe-promoting stathmin.

The two critical concentrations  $s_\lambda$  and  $s_v$  control the mean length  $\langle x_{\text{MT}} \rangle$ , as we see in Fig. S2. For  $s = s_\lambda$ , we have  $\langle x_{\text{MT}} \rangle = L/2$ , for  $s \geq s_v$ , we have  $\langle x_{\text{MT}} \rangle = 0$  according to their definition (see main text).

For tubulin-sequestering stathmin and simulation parameters as given in Table 2 in the main text corresponding to  $[T_0] = 19.4\mu\text{M}$  or a total number of  $N_T = 10000$  tubulin molecules in the simulation box, the critical concentrations of stathmin molecules (normalized by the total tubulin concentration  $[T_0]$ ) are

$$s_\lambda = \frac{S_\lambda}{[T_0]} = \frac{N_{S,\lambda}}{N_T} = 0.419 \quad \text{and} \quad s_v = \frac{S_v}{[T_0]} = \frac{N_{S,v}}{N_T} = 0.528. \quad (\text{S10})$$

The values  $s_\lambda$  and  $s_v$  are only weakly  $[T_0]$ -dependent; for  $[T_0]$  in the range  $[T_0] = 10 - 20\mu\text{M}$ ,

we find  $s_\lambda = 0.34 - 0.42$  and  $s_v = 0.51 - 0.53$ .

For catastrophe-promoting stathmin, the MT growth velocity is not affected by stathmin, which formally results in an infinite  $S_v$ . A critical concentration  $S_\lambda$  can still be defined in the same way, and we find  $S_\lambda = (v_+\omega_r - v_-\omega_c(0))/k_c v_-$  from Eqs. (4) and (16) in the main text. The MT growth velocity  $v_+$  is linearly increasing with  $[T] = [T_0]$ , see Eq. (6) in the main text, and  $\omega_c(0)$  correspondingly decreasing according to Eq. (7) in the main text. For high tubulin concentrations,  $s_\lambda$  approaches the  $[T_0]$ -independent limit  $s_\lambda \approx \kappa_{\text{on}} d\omega_r / v_- k_c = 0.91$ , which is significantly above the typical values close to 0.5 for tubulin-sequestering stathmin. For the simulation parameters as given in Table 2 in the main text corresponding to  $[T_0] = 19.4\mu\text{M}$  or a total number of  $N_T = 10000$  tubulin molecules in the simulation box, the critical concentration of stathmin molecules (normalized by the total tubulin concentration  $[T_0]$ ) is

$$s_\lambda = \frac{S_\lambda}{[T_0]} = \frac{N_{S,\lambda}}{N_T} = 0.866. \quad (\text{S11})$$

The value  $s_\lambda$  is only weakly  $[T_0]$ -dependent, for  $[T_0]$  in the range  $[T_0] = 10 - 20\mu\text{M}$ , we find  $s_\lambda = 0.79 - 0.87$ .

The stochastic simulation results for the MT length distribution also agree with the analytical result (3) in the main text. At the critical stathmin concentration  $s = s_\lambda$ , the condition  $\lambda^{-1} = 0$  results in a flat MT length distribution, as confirmed in inset (b) in Fig. S2. For  $s > s_\lambda$ , we find the length distribution of the MT to be a negative exponential (see inset (c) in Fig. S2). For  $s < s_\lambda$ , we find the length distribution of the MT to be a positive exponential (see inset (a) in Fig. S2). For a system which contains constitutively active stathmin and no Rac, the growth velocity  $v_+$  is independent of the position (not taking into account the small diffusion-induced fluctuations of the local stathmin concentration). Therefore, we always expect an exponential MT length distribution according to Eq. (3) in the main text. In particular, we do not expect bimodal MT length distributions in the absence of Rac, as confirmed by the stochastic simulation in the insets in Fig. S2.

## 4 Bifurcation analysis for closed feedback

In the bifurcation analysis we consider the stationary system state for a closed feedback loop.

A given fraction  $r_{\text{on}}$  of activated Rac then determines the MT contact probability  $p_{\text{MT}} = m \int_{L-\delta}^L p_+(x, t)$  (see Eq. (9) in the main text) via (i) a stationary gradient in stathmin activation (a decreasing profile  $S_{\text{on}}(x)$ ), (ii) a resulting MT growth velocity gradient (an increasing growth velocity  $v_x(x)$ ) established by tubulin sequestering, and (iii) the resulting stationary MT length distribution and, in particular, the probability  $p_+(x)$  to find a particular MT in the growing state. These three dependencies can be described analytically and the resulting equations can be easily evaluated numerically:

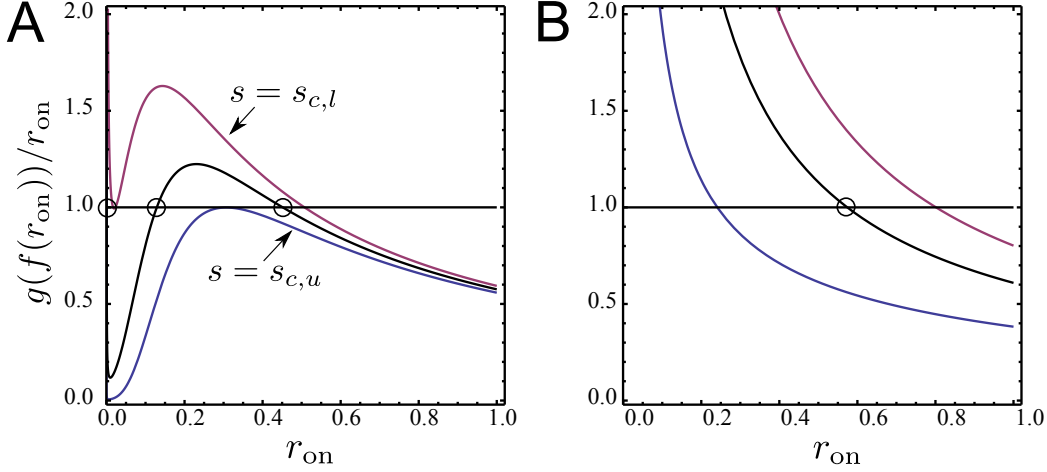

Figure S3: Function  $g(f(r_{\text{on}}))/r_{\text{on}}$  for  $m = 1$  and three different values of stathmin/tubulin  $s = S_{\text{tot}}/[T_0]$  for (A) tubulin-sequestering stathmin and (B) catastrophe-promoting stathmin. For tubulin-sequestering stathmin (A), the lines are for  $s = s_{c,l} = 0.446$  (blue),  $s = s_{c,u} = 0.459$  (red), and  $s = 0.453$  (black). For  $s_{c,l} < s < s_{c,u}$  (black line  $s = 0.453$ ) there exist three fixed points (circles). The middle fixed point is unstable. For catastrophe-promoting stathmin (B) the lines are for  $s = 0.1$  (blue),  $s = 1.7$  (red), and  $s = 1.1$  (black). There is always a single fixed point.

- (i) The stationary gradient in stathmin activation can be calculated by Eq. (11) in the main text, where  $r_{\text{on}}$  enters the gradient amplitude  $A$ , which is given by Eq. (12) in the main text. This allows us to calculate the stathmin activation profile  $S_{\text{on}}(x)/S_{\text{tot}}$  for any fixed level  $r_{\text{on}}$  of activated Rac. For constitutively active Rac,  $r_{\text{on}} = 1$ , the result is shown and tested versus stochastic simulations in Fig. S1.
- (ii) From the stathmin activation gradient  $S_{\text{on}}(x)/S_{\text{tot}}$  we obtain  $s_{\text{on}} = S_{\text{on}}(x)/[T_0] = s(S_{\text{on}}(x)/S_{\text{tot}})$  with the total stathmin/tubulin  $s = S_{\text{tot}}/[T_0]$ . For tubulin-sequestering stathmin, this is used to determine the spatially dependent tubulin concentration  $[T](x) = [T_0]t(s_{\text{on}}(x))$  through Eq. (14) in the main text. This free tubulin concentration profile can be used to calculate the MT growth velocity profile  $v_+ = v_+([T_0]t(s_{\text{on}}(x)))$  according to Eq. (15) in the main text.
- (iii) For tubulin-sequestering stathmin, the position-dependent growth velocity  $v_+(x)$  also gives rise to a position-dependent catastrophe rate  $\omega_c = \omega_c(v_+(x))$  (see Eq. (7) in the main text). For catastrophe-promoting stathmin, the stathmin activation gradient directly gives rise to position-dependent catastrophe rate  $\omega_c = \omega_c(S_{\text{on}}(x))$  via relation

(16) in the main text. Finally, we obtain a position dependent MT growth parameter  $\lambda(x) = v_+(x)v_-(x)/(v_+(x)\omega_r - v_-\omega_c(x))$  for both models of stathmin action (see Eq. (4) in the main text). This allows us to calculate the relevant MT length distribution  $p_+(x)$  according to Eq. (17) from the main text.

This scheme allows us to calculate  $p_+(x)$  and, thus,  $p_{MT}$  for any fixed level  $r_{\text{on}}$ , i.e., to implement a function  $p_{MT} = f(r_{\text{on}})$ . Vice versa, for a closed feedback, the contact probability also determines the Rac activation level  $r_{\text{on}}$  via (10) in the stationary state, which specifies a second function  $r_{\text{on}} = g(p_{MT})$ . At the stationary state for closed feedback, the fixed point condition  $r_{\text{on}} = g(f(r_{\text{on}}))$  has to hold, which selects possible fixed point values  $r_{\text{on}}^*$  for the Rac activation level  $r_{\text{on}}$ . If

$$\left. \frac{dg(f(r))}{dr} \right|_{r=r_{\text{on}}^*} < 1 \quad (\text{S12})$$

the fixed point is stable, otherwise it is unstable. For a stable fixed point, an increase  $\delta r_{\text{on}}$  in  $r_{\text{on}}$  by perturbation gives rise to a down-regulation of  $r_{\text{on}}$  because the corresponding increase  $\delta p_{MT}$  is not sufficient to maintain the increased level  $r_{\text{on}} + \delta r_{\text{on}}$ .

Analyzing the function  $g(f(r_{\text{on}}))$  for tubulin-sequestering stathmin, we find two saddle-node bifurcations typical for a bistable switch. For stathmin/tubulin  $s = S_{\text{tot}}/[T_0]$  between a lower critical value  $s_{c,l}$  ( $s_{c,l} = 0.446$  for  $m = 1$  increasing to  $s_{c,l} = 0.453$  for  $m = 10$ ) and an upper critical value  $s_{c,u}$  ( $s_{c,u} = 0.459$  for  $m = 1$  increasing to  $s_{c,u} = 0.492$  for  $m = 10$  and approaching  $s_{c,u} \approx s_v = 0.528$  for large  $m$ ) there exist three fixed points, the middle one of which is unstable (see Fig. S3 A).

This bifurcation behavior represents a bistable switch with stathmin/tubulin  $s$  as control parameter as can be clearly seen from Fig. S4. In the left Fig. S4, the Rac activation fixed points  $r_{\text{on}}^*$  are shown as a function of  $s$ . In the right Fig. S4, the corresponding average MT length  $\langle x_{MT} \rangle$  is shown.

For catastrophe-promoting stathmin we always find a *single* fixed point and no sign of a bifurcation for all stathmin/tubulin  $s = S_{\text{tot}}/[T_0]$  values (see Fig. S3 B).

## 5 Robustness of results

In this section, we address the robustness of our results with respect to changes in the catastrophe model and the system length.

### 5.1 Robustness with respect to the catastrophe model

The catastrophe model described by Eq. (7) in the main text and used throughout the manuscript is based on the experimental results by Janson *et al.* (2) and, in this sense, of phenomenological nature. Other catastrophe models have been formulated in the literature.

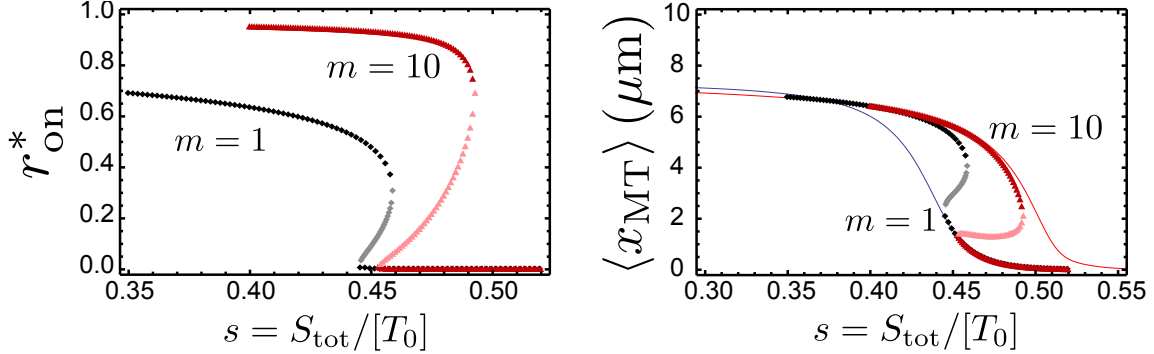

Figure S4: Left: Rac activation fixed points  $r_{\text{on}}^*$  for tubulin-sequestering stathmin as a function of stathmin/tubulin  $s = S_{\text{tot}}/[T_0]$  for  $m = 1$  (black data points) and  $m = 10$  (red data points). For  $s_{c,l} < s < s_{c,u}$  there exist three fixed points. The middle fixed point are unstable (light red and light black data points). Right: Corresponding average MT length  $\langle x_{\text{MT}} \rangle$  for the fixed point values  $r_{\text{on}}^*$  as a function of  $s$ . Lines show the average MT length  $\langle x_{\text{MT}} \rangle$  for a system without Rac and constitutively active stathmin ( $r_{\text{on}} = 0$ , blue line) and for constitutively active Rac ( $r_{\text{on}} = 1$ , red line).

Because there is no strict consensus on a particular catastrophe model, it is important that results are robust with respect to a change of the catastrophe model.

Another frequently used catastrophe model due to Flyvbjerg *et al.* is based on an analytical calculation of the first passage rate to a state with vanishing GTP-cap for a model for cooperative hydrolysis of GTP-tubulin (3). In a cooperative model, hydrolysis proceeds by a combination of both random and vectorial mechanisms (4). In Ref. (3), the catastrophe rate has been calculated as implicit function of the growth velocity  $v_+$  and two hydrolysis parameters  $v_h$  (characterizing the vectorial part) and  $r$  (characterizing the random part). The exact dimensionless catastrophe rate  $\alpha \equiv \omega_c D^{-1/3} r^{-2/3}$  is given by the smallest solution of

$$Ai'(\gamma^2 - \alpha) = -\gamma Ai(\gamma^2 - \alpha) \quad (\text{S13})$$

with  $\gamma \equiv v D^{-2/3} r^{-1/3} / 2$ , where  $v \equiv v_+ - v_h$  and  $D \equiv (v_+ + v_h) d / 2$  [ $Ai'(x) \equiv dAi(x)/dx$ ]. Here  $Ai$  denotes the first Airy function. We use a numerical implementation of this analytical result in simulations and mean-field calculations: We solve Eq. (S13) numerically to calculate the function  $\alpha = \omega_c D^{-1/3} r^{-2/3}$  as a function of  $\gamma$ . From this numerical solution we obtain the catastrophe rate as function of the MT growth velocity,  $\omega_c = \omega_c(v_+)$ . The hydrolysis parameters  $v_h \simeq 4.2 \times 10^{-9}$  m/s and  $r \simeq 3.7 \times 10^6$  m<sup>-1</sup>s<sup>-1</sup> (3) are fixed during the simulation.

Results for this alternative catastrophe model by Flyvbjerg *et al.* are shown in Fig.

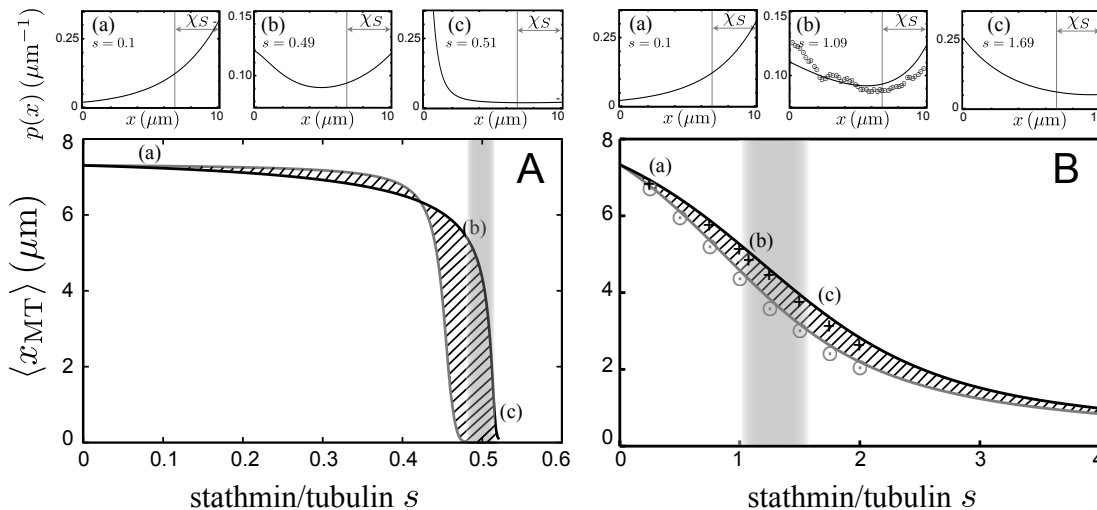

Figure S5: Results for the alternative Flyvbjerg catastrophe model analogously to Fig. 3 in the main text. Stochastic simulation data (data points) and analytical master equation results (solid lines) for the mean MT length  $\langle x_{\text{MT}} \rangle$  as a function of stathmin/tubulin  $s = S_{\text{tot}}/[T_0]$ . We compare the system with constitutively active Rac ( $r_{\text{on}} = 1$ , black lines and crosses) in comparison to the system without Rac ( $r_{\text{on}} = 0$ , gray lines and circles) both for tubulin-sequestering stathmin (A) and catastrophe-promoting stathmin (B). The hatched area indicates the possible MT length gain by Rac regulation. The gray shaded area indicates the region, in which MTs exhibit bimodal length distributions for constitutively active Rac. The insets (a), (b), (c) show the corresponding MT length distributions for three particular values of  $s$  with (a)  $s < s_\lambda$ , (b)  $s = s_\lambda$  and (c)  $s > s_\lambda$ .

S5. Analogously to Fig. 3 in the main text, we show both results for tubulin-sequestering stathmin (Fig. S5 A) and catastrophe-promoting stathmin (Fig. S5 B). We obtain the same main features using the alternative catastrophe model: We find a switchlike dependence of MT length on the overall stathmin/tubulin both for tubulin-sequestering and catastrophe-promoting stathmin. We obtain bimodal MT length distributions both for tubulin-sequestering and catastrophe-promoting stathmin. We find bistability for tubulin-sequestering stathmin (see Fig. S6), whereas there is no bistability for catastrophe-promoting stathmin.

## 5.2 Robustness with respect to the system length

Cells have different lengths. Therefore we also investigated the robustness of our results with respect to changes in the system length  $L$ . In the main text we used  $L = 10 \mu\text{m}$ ,



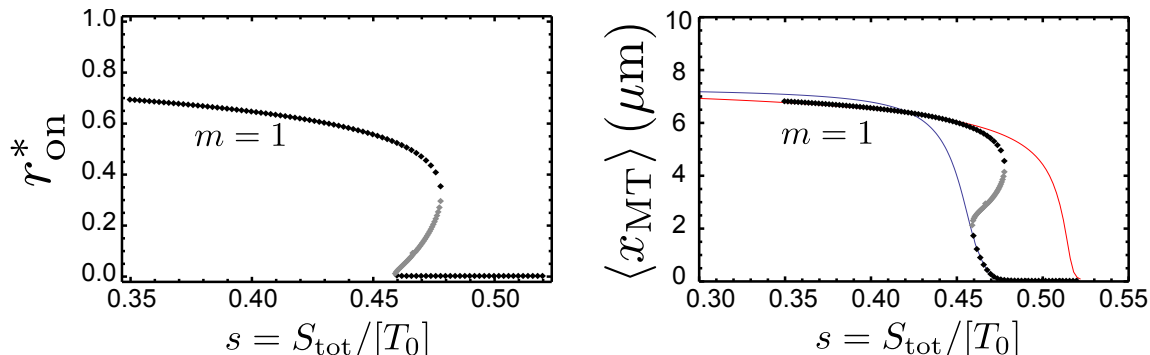

Figure S6: As in Fig. S4 but for the Flyvbjerg catastrophe mode. Left: Rac activation fixed points  $r_{\text{on}}^*$  for tubulin-sequestering stathmin as a function of stathmin/tubulin  $s = S_{\text{tot}}/[T_0]$  for  $m = 1$ . For  $s_{c,l} < s < s_{c,u}$  there exist three fixed points. The middle fixed point are unstable (light black data points). Right: Corresponding average MT length  $\langle x_{\text{MT}} \rangle$  for the fixed point values  $r_{\text{on}}^*$  as a function of  $s$ . Lines show the average MT length  $\langle x_{\text{MT}} \rangle$  for a system without Rac and constitutively active stathmin ( $r_{\text{on}} = 0$ , blue line) and for constitutively active Rac ( $r_{\text{on}} = 1$ , red line).

here we present additional simulation results for a longer system  $L = 20 \mu\text{m}$  in Fig. S7. It is important to notice that one *fixed* length scale within the feedback loop is set by the characteristic scale  $\chi_S = \sqrt{D/k_{\text{on},S}}$  (see Eq. (S8)) of the stathmin activation gradient. For parameters as in Table 2 in the main text, we have  $\chi_S \simeq 3.87 \mu\text{m}$ . The length scale  $\chi_S$  is the typical size of the cell-edge region  $L - \chi_S < x < L$  in which stathmin is deactivated. The stathmin activation profile becomes very flat in the remaining region  $0 < x < L - \chi_S$ , which increases in size if the system size  $L$  is increased.

Qualitatively, we find the same behavior for a longer system  $L = 20 \mu\text{m}$  as for the shorter system  $L = 10 \mu\text{m}$  with a switchlike dependence of MT length on the overall stathmin/tubulin, a bimodal MT length distributions both for tubulin-sequestering and catastrophe-promoting stathmin and bistability only for tubulin-sequestering stathmin. As a result of the more shallow gradient in large parts of the cell, however, the switching behavior of the MT length as a function of the total stathmin level becomes steeper, see Fig. S7 for tubulin-sequestering stathmin. Accordingly, for tubulin-sequestering stathmin, the windows of stathmin concentrations, where we find bimodal MT length distributions and where we find bistability, are narrower for longer cells.

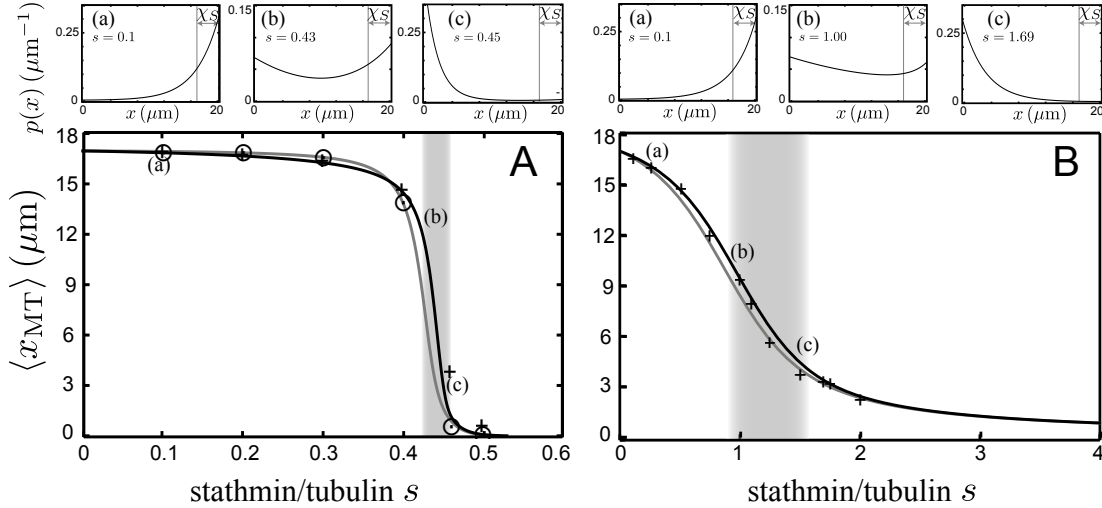

Figure S7: Results for a larger system of length  $L = 20 \mu\text{m}$ , analogously to Fig. 3 in the main text, which is for  $L = 10 \mu\text{m}$ . Stochastic simulation data (data points) and analytical master equation results (solid lines) for the mean MT length  $\langle x_{\text{MT}} \rangle$  as a function of stathmin/tubulin  $s = S_{\text{tot}}/[T_0]$ . We compare the system with constitutively active Rac ( $r_{\text{on}} = 1$ , black lines and crosses) in comparison to the system without Rac ( $r_{\text{on}} = 0$ , gray lines and circles) both for tubulin-sequestering stathmin (A) and catastrophe-promoting stathmin (B). The gray shaded area indicates the region, in which MTs exhibit bimodal length distributions for constitutively active Rac. The insets (a), (b), (c) show the corresponding MT length distributions for three particular values of  $s$  with (a)  $s < s_\lambda$ , (b)  $s = s_\lambda$  and (c)  $s > s_\lambda$ .

## Supporting References

1. Brown, G. C., and B. N. Kholodenko. 1999. Spatial gradients of cellular phosphoproteins. *FEBS Lett.* 457:452–4.
2. Janson, M. E., M. E. de Dood, and M. Dogterom. 2003. Dynamic instability of microtubules is regulated by force. *J. Cell Biol.* 161:1029–34.
3. Flyvbjerg, H., T. E. Holy, and S. Leibler. 1996. Microtubule dynamics: Caps, catastrophes, and coupled hydrolysis. *Phys. Rev. E* 54:5538–5560.
4. Li, X., J. Kierfeld, and R. Lipowsky. 2009. Actin Polymerization and Depolymerization Coupled to Cooperative Hydrolysis. *Phys. Rev. Lett.* 103:048102.
